# Supplementary material for: Association between psychosocial work-related factors at midlife and arterial stiffness at older age in a prospective cohort of 1736 white-collar workers
Source: PubMed Central journal article supplement — BMJ Open. 2023 Sep 27;13(9):e073649. doi: 10.1136/bmjopen-2023-073649 (PMC10537828; doi:10.1136/bmjopen-2023-073649), 2023-09-27
Supplement: bmjopen-2023-073649.draft_revisions.pdf [file bmjopen-2023-073649.draft_revisions.pdf]

# BMJ Open

BMJ Open is committed to open peer review. As part of this commitment we make the peer review history of every article we publish publicly available.

When an article is published we post the peer reviewers' comments and the authors' responses online. We also post the versions of the paper that were used during peer review. These are the versions that the peer review comments apply to.

The versions of the paper that follow are the versions that were submitted during the peer review process. They are not the versions of record or the final published versions. They should not be cited or distributed as the published version of this manuscript.

BMJ Open is an open access journal and the full, final, typeset and author-corrected version of record of the manuscript is available on our site with no access controls, subscription charges or pay-per-view fees (<http://bmjopen.bmj.com>).

If you have any questions on BMJ Open's open peer review process please email [info.bmjopen@bmj.com](mailto:info.bmjopen@bmj.com)

# BMJ Open

## Association between psychosocial work-related factors at midlife and arterial stiffness at older age among 1,736 white-collar workers

|                               |                                                                                                                                                                                                                                                                                                                                                                                                                                                                                                                                                                                                                                                                                                                                                                                                                                                                                                                                                                                                                                                                                                                                                                                                                                                                         |
|-------------------------------|-------------------------------------------------------------------------------------------------------------------------------------------------------------------------------------------------------------------------------------------------------------------------------------------------------------------------------------------------------------------------------------------------------------------------------------------------------------------------------------------------------------------------------------------------------------------------------------------------------------------------------------------------------------------------------------------------------------------------------------------------------------------------------------------------------------------------------------------------------------------------------------------------------------------------------------------------------------------------------------------------------------------------------------------------------------------------------------------------------------------------------------------------------------------------------------------------------------------------------------------------------------------------|
| Journal:                      | <i>BMJ Open</i>                                                                                                                                                                                                                                                                                                                                                                                                                                                                                                                                                                                                                                                                                                                                                                                                                                                                                                                                                                                                                                                                                                                                                                                                                                                         |
| Manuscript ID                 | bmjopen-2023-073649                                                                                                                                                                                                                                                                                                                                                                                                                                                                                                                                                                                                                                                                                                                                                                                                                                                                                                                                                                                                                                                                                                                                                                                                                                                     |
| Article Type:                 | Original research                                                                                                                                                                                                                                                                                                                                                                                                                                                                                                                                                                                                                                                                                                                                                                                                                                                                                                                                                                                                                                                                                                                                                                                                                                                       |
| Date Submitted by the Author: | 26-Mar-2023                                                                                                                                                                                                                                                                                                                                                                                                                                                                                                                                                                                                                                                                                                                                                                                                                                                                                                                                                                                                                                                                                                                                                                                                                                                             |
| Complete List of Authors:     | <p>Massamba, Victoria; Université Laval, Department of social and preventive medicine; Centre de recherche du CHU de Québec-Université Laval</p> <p>Talbot, Denis; Université Laval, Department of social and preventive medicine; Université Laval, Department of social and preventive medicine</p> <p>Milot, Alain; Centre de recherche du CHU de Québec-Université Laval; Université Laval</p> <p>Trudel, Xavier; Laval University,</p> <p>Vezina, Michel ; Institut national de santé publique du Québec (INSPQ)</p> <p>Dionne , Clermont E; Université Laval, Department of social and preventive medicine; Centre de recherche du CHU de Québec-Université Laval</p> <p>Mâsse, Benoit; Université de Montréal</p> <p>Gilbert-Ouimet, Mahée; Centre de recherche du CHU de Québec-Université Laval; Université du Québec à Rimouski, Department of health sciences</p> <p>Dagenais, Gilles; Institut universitaire de cardiologie et de pneumologie de Québec</p> <p>Pearce, Neil; London school of hygiene and tropical Medicine, Departments of medical statistics and non-communicable disease epidemiology</p> <p>Brisson, Chantal; Université Laval, Department of social and preventive medicine; Centre de recherche du CHU de Québec-Université Laval</p> |
| Keywords:                     | EPIDEMIOLOGY, Risk Factors, OCCUPATIONAL & INDUSTRIAL MEDICINE                                                                                                                                                                                                                                                                                                                                                                                                                                                                                                                                                                                                                                                                                                                                                                                                                                                                                                                                                                                                                                                                                                                                                                                                          |

SCHOLARONE™  
Manuscripts

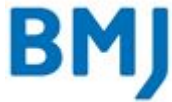

I, the Submitting Author has the right to grant and does grant on behalf of all authors of the Work (as defined in the below author licence), an exclusive licence and/or a non-exclusive licence for contributions from authors who are: i) UK Crown employees; ii) where BMJ has agreed a CC-BY licence shall apply, and/or iii) in accordance with the terms applicable for US Federal Government officers or employees acting as part of their official duties; on a worldwide, perpetual, irrevocable, royalty-free basis to BMJ Publishing Group Ltd ("BMJ") its licensees and where the relevant Journal is co-owned by BMJ to the co-owners of the Journal, to publish the Work in this journal and any other BMJ products and to exploit all rights, as set out in our [licence](#).

The Submitting Author accepts and understands that any supply made under these terms is made by BMJ to the Submitting Author unless you are acting as an employee on behalf of your employer or a postgraduate student of an affiliated institution which is paying any applicable article publishing charge ("APC") for Open Access articles. Where the Submitting Author wishes to make the Work available on an Open Access basis (and intends to pay the relevant APC), the terms of reuse of such Open Access shall be governed by a Creative Commons licence – details of these licences and which [Creative Commons](#) licence will apply to this Work are set out in our licence referred to above.

Other than as permitted in any relevant BMJ Author's Self Archiving Policies, I confirm this Work has not been accepted for publication elsewhere, is not being considered for publication elsewhere and does not duplicate material already published. I confirm all authors consent to publication of this Work and authorise the granting of this licence.

1  
2  
3  
4  
5 **Association between psychosocial work-related factors at midlife and arterial**  
6 **stiffness at older age among 1,736 white-collar workers**  
7  
8  
9

10  
11  
12 Victoria Kubuta Massamba<sup>1,2</sup>, Denis Talbot<sup>1,2</sup>, Alain Milot<sup>2,3</sup>, Xavier Trudel\*<sup>1,2</sup>, Michel  
13 Vézina<sup>4</sup>, Clermont E. Dionne<sup>1,2</sup>, Benoît Mâsse<sup>5</sup>, Mahée Gilbert-Ouimet<sup>2,6</sup>, Gilles R.  
14 Dagenais<sup>3,7</sup>, Neil Pearce<sup>8</sup>, Chantal Brisson<sup>1,2</sup>  
15  
16

17  
18  
19 <sup>1</sup> Department of social and preventive medicine, Université Laval, Québec, QC, Canada.

20 <sup>2</sup> Centre de recherche du CHU de Québec-Université Laval, Québec, QC, Canada.

21 <sup>3</sup> Faculty of medicine, Université Laval, Québec, QC, Canada.

22 <sup>4</sup> Institut national de santé publique du Québec (INSPQ), Québec, QC, Canada.

23 <sup>5</sup> School of public health, Université de Montréal, Montréal, QC, Canada.

24 <sup>6</sup> Department of health sciences, Université du Québec à Rimouski, Lévis, QC, Canada.

25 <sup>7</sup> University institute of cardiology and pneumology of Québec (IUCPQ), Québec, QC, Canada

26 <sup>8</sup> Departments of medical statistics and non-communicable disease epidemiology, London school of hygiene  
27 and tropical Medicine, London, UK.  
28  
29  
30  
31

32  
33 \*Corresponding author. Centre de recherche du CHU de Québec – Université Laval, Hôpital du Saint-Sacrement, 1050  
34 Chemin Ste-Foy, Québec (QUE) G1V 0A6, Canada. Tel: 418-682-7390; Fax: 418-682-7949;  
35 [xavier.trudel@crchudequebec.ulaval.ca](mailto:xavier.trudel@crchudequebec.ulaval.ca)  
36  
37  
38  
39  
40

41 Key words: Psychosocial work-related factors, arterial stiffness, blood pressure,  
42 prevention.  
43

44 Number of words: 2942 (from the introduction to the conclusion, excluding title page,  
45 abstract, references, figures and tables)  
46  
47  
48  
49  
50  
51  
52  
53  
54  
55  
56  
57  
58  
59  
60

## Abstract

**Objective** – Arterial stiffness and exposure to psychosocial work-related factors increase the risk of developing cardiovascular disease (CVD). However, little is known about the relationship between psychosocial work-related factors and arterial stiffness. We aimed to examine this relationship.

**Methods** – The sample included 1,736 (female 52%) participants from the PROspective Québec Study on Work and Health, a three-wave cohort study (T1:1991-1993, T2:1999-2001 and T3: 2015-2018) of white-collar workers in Quebec City (Canada). Psychosocial work-related factors, job strain and effort-reward imbalance (ERI), were assessed at T2 with validated instruments. Arterial stiffness was assessed using carotid-femoral pulse wave velocity at T3, on average 16 years later. Generalized estimating equations were used to estimate differences in arterial stiffness between exposed and unexposed participants. Subgroup analyses according to sex, age, blood pressure (BP), cardiovascular risk score and employment status were conducted.

**Results** – Among participants with high diastolic BP ( $\geq 90$  mmHg) at T2, aged 47 on average, those exposed to high job strain had higher arterial stiffness (+1.38 m/s (95% CI: +0.57; +2.19)) at T3, 16 years later, following adjustment for a large set of potential confounders. The trend was similar in participants with high systolic BP ( $\geq 140$  mmHg) exposed to high job strain (+0.84 m/s (95% CI: -0.35; +2.03)). No association was observed for ERI in the total sample and counterintuitive associations were observed in subgroup analyses.

**Conclusions** – Job strain may have a long-term deleterious effect on arterial stiffness in people with high BP. Interventions at midlife to reduce job strain may mitigate arterial stiffness progression.

### Strengths and limitations of this study

- This study has a long follow-up period of 16 years.
- Arterial stiffness was measured using carotid-femoral pulse wave velocity, the gold standard.
- Psychosocial work-related factors were assessed using validated tools.
- This study examines the effect of psychosocial work-related factors measured at a single point in time.

## Key questions

### What is already known on this subject?

There is evidence that adverse psychosocial work-related factors contribute to the development of cardiovascular disease. Arterial stiffness, measured using carotid-femoral pulse wave velocity (cfPWV), is a major predictor of cardiovascular mortality and morbidity. Little is known about the relationship between psychosocial work-related factors and arterial stiffness.

### What might this study add?

The present longitudinal study including 1,736 white-collar workers examined the long-term effects of exposure to psychosocial work-related factors (job strain and effort-reward imbalance) on arterial stiffness measured using cfPWV (gold standard). The study suggests that participants with high BP who are exposed to job strain at midlife (mean age < 50 years) may have increased arterial stiffness 16 years later.

### How might this impact on clinical practice?

Because psychosocial work-related factors from the job strain model are frequent and modifiable, interventions to reduce exposure to these risk factors early on may mitigate arterial stiffness progression.

## Introduction

Cardiovascular disease (CVD) is a major public health problem. CVD develops over several years across a continuum initiated by one or several risk factors, which can progress to atherosclerosis, cardiovascular events and end-stage organ disease (1). The main modifiable risk factors for CVD include dyslipidemia, high blood pressure (BP), smoking, diabetes and adiposity. Additional factors such as psychosocial work-related factors can contribute to increase the risk of CVD (2). In Organisation for Economic Co-operation and Development countries, 20-25% of workers are exposed to adverse psychosocial work-related factors (3).

Arterial stiffness describes the reduced ability of large proximal arteries to dilate and retract. Carotid-femoral pulse wave velocity (cfPWV), the gold standard method for assessing aortic stiffness, is linearly associated with CVD risk (4). An increase in aortic pulse wave velocity of 1 m/s corresponds to an adjusted risk increase of 14% in fatal or nonfatal cardiovascular events (4). Adverse psychosocial work-related factors may be associated with high arterial stiffness. Results of prior studies differ according to types of exposure and sex, suggesting deleterious (5-9), beneficial (10) or no effect (11) of psychosocial work-related factors on arterial stiffness. All prior studies are limited by their cross-sectional design. None used the gold standard measure for arterial stiffness.

The objective of the present study was to examine the association between psychosocial work-related factors and arterial stiffness in a prospective cohort study of men and women from Quebec City, Canada. Men and women were considered separately since the prevalence of psychosocial work-related factors and their effects differ by sex (2). Elevated midlife BP is associated with increased arterial stiffness (12). The relationship between midlife psychosocial work-related factors and arterial stiffness might therefore vary between people with and without elevated BP. This potential effect modification was examined.

## Methods

### *Population and study design*

Data were drawn from a three-wave (T1:1991-1993, T2:1999-2001 and T3: 2015-2018) prospective cohort study including, at T1, 9,188 white-collar workers (participation

1  
2  
3 proportion: 75%) from 19 public organizations in Quebec City, aged 18 to 65 years old.  
4 Among participants at T1, 8,120 (88.4 %) and 6,707 (73 %) participated at T2 and T3,  
5 respectively. Arterial stiffness was measured in 1/3 of participants randomly selected. The  
6 final sample included 1,736 participants with employee status at T2 (Figure 1). The *Centre*  
7 *Hospitalier Universitaire de Québec – Université Laval* (CHUdeQc-UL) ethical research  
8 committee (2012-1674; DR-002-1409; F9H-63202) approved the study. All participants  
9 signed an informed consent form.  
10  
11  
12  
13  
14  
15

### 16 17 *Data collection*

18 At each wave, workers completed a self-administered questionnaire on risk factors  
19 for hypertension and CVD, demographic, occupational and social characteristics. Trained  
20 staff measured BP (using the mercury sphygmomanometer at T1 and T2 and the automated  
21 BP-TRU device (VSM MedTech, Coquitlam, Canada) at T3), height, weight, and waist  
22 circumference. Arterial stiffness was measured at T3.  
23  
24  
25  
26  
27  
28

### 29 *Psychosocial work-related factors*

30 Job strain and effort-reward imbalance (ERI) exposures were assessed at T2 (1999-  
31 2001). Components of job strain (psychological demands and job control) were measured  
32 using 18 items from the Job Content Questionnaire (13). Psychological demands include  
33 the quantity of work, time constraints and level of intellectual effort. Job control includes  
34 opportunities for learning, autonomy, and participation in the decision-making process.  
35 The theoretical model postulates that the greatest health risk occurs in workers combining  
36 high demands and low control. The psychometric properties of the original English (14)  
37 and French (15) questionnaires have been demonstrated. We classified workers with  
38 demands scores  $\geq 24$  (the median in the Quebec working population) in the *high demands*  
39 group and those with control scores  $\leq 72$  (the median in the Quebec working population) in  
40 the *low control* group. The *low strain* group included workers combining *low demands* and  
41 *high control*. The *passive*, *active* and *high strain* groups included respectively people  
42 combining *low demands* and *low control*, *high demands* and *high control* and *high demands*  
43 and *low control*.  
44  
45  
46  
47  
48  
49  
50  
51  
52  
53  
54  
55  
56  
57  
58  
59  
60



1  
2  
3 The ERI model states that efforts should be rewarded with income, respect and  
4 esteem, and occupational status control. Workers are in a state of deleterious imbalance  
5 when high efforts are accompanied by low reward, and are more susceptible to health  
6 problems. The modified French version of the questionnaire was used to assess ERI.  
7 Reward at work was measured by nine original questions from the French version (16) of  
8 the ERI scale. Effort was measured by nine items from the validated French version of the  
9 psychological demand scale of the Job Content Questionnaire (17). The psychometric  
10 qualities of this ERI scale version have been demonstrated (18). Effort and reward scores  
11 were computed with the sum of items. A ratio efforts/reward > 1 indicated an imbalance.  
12 The ratio was also used in its continuous form.  
13  
14  
15  
16  
17  
18  
19  
20  
21

### 22 *Arterial stiffness as cfPWV (m/s)*

23  
24 Arterial stiffness was measured at T3 using the Complior Analyse device (Alam  
25 Medical, Saint-Quentin-Fallavier, France). The transit time between the carotid and the  
26 femoral pulse was measured twice in each participant. cfPWV was calculated by dividing  
27 the carotid-femoral transit distance (calculated using the difference in body surface  
28 measurements from the suprasternal notch to the femoral and carotid sites) by the carotid-  
29 femoral transit time delay. A third measurement was taken if the difference between the  
30 two measurements was > 0.5 m/s. Inter- and intra-observer reproducibility of this  
31 measurement has been reported as excellent (19).  
32  
33  
34  
35  
36  
37  
38

### 39 *Covariates*

40  
41 Potential confounders included the following risk factors for arterial stiffness:  
42 demographic characteristics (age, sex, education, household income, marital status and  
43 having children); biological factors (BP, body mass index (BMI), waist circumference,  
44 diabetes, hypercholesterolemia and personal history of cardiovascular event), lifestyle  
45 factors (daily smoking, alcohol abuse and leisure time physical activity); family history of  
46 CVD at  $\leq 60$  years of age; psychological distress (Psychiatric Symptom Index); other work  
47 factors (hours worked for the organization, hours worked for another organization).  
48  
49  
50  
51  
52  
53

### 54 *Statistical analyses*

1  
2  
3 Continuous data were expressed as the mean along with the standard deviation.  
4 Categorical data were expressed as number and percentages. Generalized estimating  
5 equations were used to estimate differences in arterial stiffness means between the exposed  
6 and unexposed groups, with their 95% confidence interval (20). Regression models  
7 accounted for the correlation between employees of the same organization. The models  
8 were sequentially adjusted for sets of covariates given that biological factors, psychological  
9 distress and lifestyle factors potentially mediate the associations (Figure S1, supplement).  
10 As job strain and ERI models provide distinct information, we assessed the independent  
11 effect of job strain and ERI by adjusting for job strain when measuring the association with  
12 ERI and vice versa. In order to assess effect modification, we conducted subgroup analyzes  
13 by sex and BP (systolic, diastolic and pulse pressure) at T2. Sensitivity analyses were also  
14 conducted i) with and without individuals with personal history of CVD since they may  
15 have increased arterial stiffness; ii) according to risk factors for arterial stiffness at T2 (age  
16 and Gaziano's cardiovascular risk score (21)) since they may increase the deleterious  
17 effects of psychosocial work-related factors (22); iii) according to job status at T3 since  
18 retirement may attenuate the effects of psychosocial work-related factors (23). Multiple  
19 imputations and inverse probability weighting were performed to minimize potential  
20 selection bias due to non-response and/or loss to follow-up. Analyses were performed with  
21 SAS 9.4 software. The level of statistical significance was set at 0.05.  
22  
23  
24  
25  
26  
27  
28  
29  
30  
31  
32  
33  
34  
35  
36  
37

### 38 Participant and public involvement

39 Patients or the public were not involved in the study design, conduct, reporting, or  
40 dissemination plans.  
41  
42  
43

## 44 Results

45 Mean follow-up time between exposure (T2) and arterial stiffness assessment (T3)  
46 was 16.8 (standard deviation: 1.3) years. At T2, participants were on average 45 years old.  
47 More women (23%) than men (17%) were exposed to high job strain. As many men as  
48 women were exposed to ERI (24%). At T3, participants were on average 62 years old  
49 (Table 1).  
50  
51  
52  
53  
54  
55  
56  
57  
58  
59  
60

1  
2  
3 Table 2 presents mean arterial stiffness at T3 in men and women according to main  
4 risk factors for cardiovascular diseases and psychosocial work-related factor at T2. Arterial  
5 stiffness (mean:  $8.1 \pm 1.7$  m/s) was higher in men, in older participants and among those  
6 with high BP, diabetes, hypercholesterolemia, high waist circumference, high BMI and  
7 moderate or high cardiovascular risk score.  
8  
9

10  
11 Table 3 presents the association between psychosocial work-related factors at T2  
12 and arterial stiffness at T3. In men, arterial stiffness was slightly higher in those with  
13 passive jobs. In women, arterial stiffness was higher in participants exposed to ERI. All  
14 differences were modest and not statistically significant, with confidence intervals  
15 including the null value.  
16  
17  
18  
19

20 Table 4 presents the association between psychosocial work-related factors and  
21 arterial stiffness according to BP at T2. The high job strain group had higher arterial  
22 stiffness ( $+1.38$  m/s (95%CI:  $+0.57$ ;  $+2.19$ )) among participants with high diastolic BP  
23 ( $\geq 90$  mmHg) and lower arterial stiffness ( $-0.25$  (95%CI:  $-0.48$ ;  $-0.02$ )) among those with  
24 lower diastolic BP ( $< 90$  mmHg). The same trend was observed for systolic BP. The high  
25 job strain group had higher arterial stiffness ( $+0.84$  m/s (95% CI:  $-0.35$ ;  $+2.03$ ),  $p=0.17$ )  
26 among those with systolic BP  $\geq 140$  mmHg. Arterial stiffness was also higher in the high  
27 job strain ( $+3.00$  (95%CI:  $+1.18$ ;  $+4.76$ )) and the passive ( $+2.06$  (95%CI:  $+0.69$ ;  $+3.44$ ))  
28 groups among participants with pulse pressure  $> 60$  mmHg. However, only 43 participants  
29 had high pulse pressure. ERI was associated with lower arterial stiffness in participants  
30 with systolic BP  $\geq 140$  mmHg ( $-1.17$  (95%CI:  $-2.12$ ;  $-0.22$ )), in those with diastolic BP  $\geq 90$   
31 mmHg ( $-0.48$  (95%CI:  $-1.10$ ;  $+0.14$ )) and with pulse pressure  $> 60$  mmHg ( $-2.06$  (95%CI:  $-$   
32  $3.33$ ;  $-0.79$ )) (Table 4).  
33  
34  
35  
36  
37  
38  
39  
40  
41  
42

43 Supplementary analyses showed that arterial stiffness tended to be higher in  
44 participants exposed to job strain who were  $\geq 55$  years old or had a moderate or high CVD  
45 risk score. The ERI group had higher arterial stiffness in the 55+ age stratum ( $+0.52$   
46 (95%CI:  $-0.67$ ;  $+1.71$ ) (Table S1, supplement). Psychosocial work-related factors were not  
47 associated with arterial stiffness when stratifying according to employment status and  
48 duration of retirement (Table S2a and S2b, supplement). The findings were similar with  
49 and without participants with history of CVD (Table S3, supplement), and before and after  
50 multiple imputation and inverse probability weighting (Table S4, supplement).  
51  
52  
53  
54  
55  
56  
57  
58  
59  
60

## Discussion

In the present study, arterial stiffness was not significantly higher in men and women exposed to high job strain and ERI overall. However, among participants with higher diastolic BP at midlife, high job strain was associated with higher arterial stiffness 16 years later. This association was robust to adjustment for socio-demographics, lifestyle-related risk factors, CVD risk factors and other factors from the work environment.

Prior studies assessing the relationship between psychosocial work-related factors and arterial stiffness were cross-sectional (5-11). Most suggest a deleterious effect (5-9). Studies suggesting a protective (10) or no effect (11) involved relatively young participants ( $\leq 40$  years). Studies showing deleterious associations included people aged over 40 years on average (5-7, 9), a high proportion of smokers ( $>40\%$ ) (5, 6) or targeted workers in professions at higher risk of developing CVD such as firefighters (9). Given their cross-sectional design, previous studies do not inform on different aspects of the temporal relationship between psychosocial work-related factors and arterial stiffness, including the optimal time window and follow-up period. The time required between exposure to psychosocial work-related factors and arterial stiffness may vary according to the position of individuals on the cardiovascular continuum. A longer follow-up time could be required for participants who are at an earlier stage than for those who are at a more advanced stage of progression. In the present study, high job strain was associated with increased arterial stiffness 16 years later (+1.38 m/s), in participants with high diastolic BP at time of exposure assessment (T2). The mean age of participants with high DBP at T2 was 47 years old. Given that diastolic hypertension predominates in relatively young individuals, at a relatively early stage of the cardiovascular continuum and that CVD develops over at least a decade, it is reasonable to postulate that the follow-up period used in the present study was appropriate for measuring the association between midlife work-related factors and arterial stiffness in participants with high DBP at midlife (12, 24).

Increased arterial stiffness was also observed among participants with high systolic BP. This association was however of smaller magnitude and did not reach statistical significance. This is consistent with the natural history of systolic/diastolic BP progression and its links with CVD diseases onset (24). On the contrary, high job strain was associated with reduced arterial stiffness in participants who did not have high BP. Measuring the

1  
2  
3 association between midlife stressors and arterial stiffness among people who do not have  
4 high BP may require a longer follow-up, which could explain the presence of this  
5 counterintuitive protective association. This is consistent with a previous cross-sectional  
6 study which showed a protective association between job strain index and brachial-ankle  
7 PWV (-1.38 m/s,  $p<0.01$ ). This previous study included young participants (median age:  
8 31 years) with diastolic (median: 79 mmHg) and systolic (median: 110 mmHg) BP in the  
9 normal range (10). Further studies are needed to confirm these results.

15 Due to limited statistical power, caution should be exercised in interpreting the  
16 trends of increased arterial stiffness among participants exposed to job strain in moderate  
17 to high cardiovascular risk score and older participants' strata. These results should be  
18 regarded as hypothesis generating. In our study, the participants who remained actively  
19 employed at T3 were relatively young (on average 39 years old) and had a low  
20 cardiovascular risk score (98%) when exposure was measured at T2. Younger age  
21 combined with low cardiovascular risk score may contribute to the absence of observed  
22 association. Indeed, among this younger subgroup, the timeframe for arterial stiffness  
23 assessment could have been suboptimal. ERI was associated with lower arterial stiffness  
24 in participants with high systolic BP, diastolic BP and high pulse pressure. This is  
25 counterintuitive and needs to be replicated.

34 In normotensive people without additional cardiovascular risk factors aged 60 to  
35 69, the reference value for arterial stiffness is on average 10.3 m/s (25). In the present  
36 study, the average value (8.3 m/s) of participants in this age group ( $n=930$ ) is lower. The  
37 attrition due to non-response and loss to follow-up may have contributed to these finding  
38 given the loss of individuals who may be sicker than those who participated, as  
39 demonstrated in this cohort (26). As expected, participants at higher risk of CVD (men,  
40 older age, high BP, diabetes, hypercholesterolemia, high waist circumference, high BMI,  
41 moderate or high cardiovascular risk score) generally had higher arterial stiffness than  
42 those at lower risk.

50 Chronic stress accelerates aging of arteries by incompletely understood  
51 mechanisms. Chronic stress can on one hand activate the sympathetic nervous system  
52 interconnected with the renin-angiotensin-aldosterone system and endothelin-1 activity  
53 and on the other hand promote risky lifestyle (27, 28). This leads to changes in vascular  
54  
55  
56  
57  
58  
59

1  
2  
3 cell phenotypes and to thickening of the arterial innermost and intermediate layers, stiffness  
4 and increase in systolic and pulse pressure later on (27). Increased arterial stiffness causes  
5 excessive transmission of pulse pressure that can damage the microcirculation of target  
6 organs, which increases the risk of cardiovascular events (29). Older subjects or those with  
7 cardiovascular risk factors could have decreased endothelial regeneration capacity due to  
8 a reduced number of circulating progenitor endothelial cells (27, 30). A reduced  
9 regenerative capacity could explain a deleterious effect of job strain in people with an  
10 increased risk of developing a cardiovascular event given their age, cardiovascular risk  
11 score or high BP. Al Mheid et al. observed significant interactions ( $P \leq 0.005$ ) between age  
12 and the burden of cardiovascular risk factors (smoking, diabetes mellitus, hypertension, or  
13 hyperlipidemia), such that for younger subjects (<40 years), cardiovascular risk factors  
14 were associated with increased progenitor cells counts, whereas for older subjects (>60  
15 years), cardiovascular risk factors and CVD were associated with lower progenitor cells  
16 counts (30).  
17  
18  
19  
20  
21  
22  
23  
24  
25  
26

27 Our study has several strengths. To our knowledge, this is the first study to examine  
28 the association between psychosocial work-related factors assessed at midlife and arterial  
29 stiffness assessed at older age, using a prospective cohort. The 16-year follow-up allowed  
30 exploration of long-term effects. Other strengths are the use of a gold standard arterial  
31 stiffness measurement and validated psychosocial work-related factors models, sequential  
32 adjustment by several potentially confounding factors, inverse probability weighting to  
33 minimize the potential for selection bias and subgroup analyzes based on a priori evidence.  
34  
35  
36  
37  
38

39 Our study has also limitations. First, the potential for selection bias due to a high  
40 proportion of missing values (40% out of 2,621 participants with employee status at T1  
41 and T2) and losses to follow-up (19% out of 2,621) may underestimate associations (26).  
42 However, the associations were similar before and after accounting for potential selection  
43 bias using multiple imputations and inverse probability weighting, suggesting that this  
44 potential bias could not have explained our results. Second, the use of a single measure of  
45 exposure limits the capacity to capture fluctuations in exposure and can lead to non-  
46 differential misclassification of exposure that may underestimate the association. Third,  
47 measuring arterial stiffness in 1/3 of participants combined with attrition reduced statistical  
48  
49  
50  
51  
52  
53  
54  
55  
56  
57  
58  
59  
60

1  
2  
3 power. Fourth, the study population was entirely composed of white-collar workers.  
4  
5 Caution is therefore advised in generalizing to other types of occupations.  
6  
7

## 8 **Conclusion**

9  
10 Job strain exposure combined with high BP at midlife may have long-term  
11 deleterious effects on arterial stiffness. Interventions at midlife to reduce job strain may be  
12 considered as a potential way to manage CVD risk.  
13  
14

### 15 Acknowledgments and affiliations

16 We thank all the participants of the study.

### 17 Contributors

18 VKM conceptualized and designed the study under the supervision of AM, DT and CB.  
19  
20 VKM conducted the analysis and drafted the manuscript. All authors reviewed the  
21 manuscript. The corresponding author attests that all listed authors meet authorship criteria  
22 and that no others meeting the criteria have been omitted.  
23  
24  
25  
26

### 27 Funding

28 This work was supported by the Canadian Institutes of Health Research (grant number  
29 MA-11364). VKM was the recipient of a research award from the FRQS and the  
30 CERSSPL-UL. DT was supported by a Junior-2 career award from the FRQS.  
31  
32  
33

### 34 Disclaimer

35 Funders had no influence on study conduct and reporting. The authors have reported that  
36 they have no relationships relevant to the contents of this paper to disclose.  
37  
38  
39  
40  
41  
42  
43  
44  
45  
46  
47  
48  
49  
50  
51  
52  
53  
54  
55  
56  
57  
58  
59  
60

**Table 1.** Population characteristics at T2 (1999-2001) (unless otherwise stated) by sex

|                                             | Missing | All 1736<br>(100.0)% | Missing | Men 839<br>(48.3%) | Missing | Women 897<br>(51.7%) |
|---------------------------------------------|---------|----------------------|---------|--------------------|---------|----------------------|
| Age y, mean (SD), T1 (1991-1993)            | 0       | 37.3 (6.6)           | 0       | 38.6 (6.9)         |         | 36.2 (6.1)           |
| Age y, mean (SD), T2 (1999-2001)            | 0       | 44.9 (6.7)           | 0       | 46.2 (7.0)         | 0       | 43.8 (6.2)           |
| Age y, mean (SD), T3 (2015-2018)            | 0       | 61.7 (6.1)           | 0       | 63.0 (6.4)         |         | 60.6 (5.6)           |
| Job strain                                  | 16      |                      | 7       |                    | 9       |                      |
| Low strain                                  |         | 298 (17.3)           |         | 174 (20.9)         |         | 124 (14.0)           |
| Passive                                     |         | 592 (34.4)           |         | 237 (28.5)         |         | 355 (40.0)           |
| Active                                      |         | 486 (28.3)           |         | 280 (33.7)         |         | 206 (23.2)           |
| High strain                                 |         | 344 (20.0)           |         | 141 (17.0)         |         | 203 (22.9)           |
| Effort-reward imbalance                     | 47      |                      | 24      |                    | 23      |                      |
| Yes                                         |         | 408 (24.2)           |         | 197 (24.2)         |         | 211 (24.1)           |
| No                                          |         | 1281<br>(75.8)       |         | 618 (75.8)         |         | 663 (75.9)           |
| Completed education                         | 12      |                      | 3       |                    | 9       |                      |
| Secondary or less<br>College (CEGEP)        |         | 334 (19.4)           |         | 67 (8.0)           |         | 267 (30.1)           |
| University                                  |         | 530 (30.7)           |         | 238 (28.5)         |         | 292 (32.9)           |
| University                                  |         | 860 (49.9)           |         | 531 (63.5)         |         | 329 (37.1)           |
| Household income \$C <sup>a</sup>           | 11      |                      | 4       |                    | 7       |                      |
| 0 - 49 999                                  |         | 426 (24.7)           |         | 144 (17.3)         |         | 282 (31.7)           |
| 50 000 - 79 999                             |         | 681 (39.5)           |         | 362 (43.4)         |         | 319 (35.8)           |
| ≥ 80 000\$                                  |         | 618 (35.8)           |         | 329 (39.4)         |         | 289 (32.5)           |
| Marital status                              | 4       |                      | 2       |                    | 2       |                      |
| Partnered                                   |         | 1328<br>(76.7)       |         | 695 (83.0)         |         | 633 (70.7)           |
| Unpartnered                                 |         | 404 (23.3)           |         | 142 (17.0)         |         | 262 (29.3)           |
| Having children                             |         |                      | 2       |                    | 1       |                      |
| One or more                                 |         |                      |         | 652 (77.9)         |         | 625 (69.8)           |
| No                                          |         |                      |         | 185 (22.1)         |         | 271 (30.3)           |
| Diabetes <sup>b</sup>                       | 0       |                      | 0       |                    | 0       |                      |
| Yes                                         |         | 34 (2.0)             |         | 16 (1.9)           |         | 18 (2.0)             |
| No                                          |         | 1702<br>(98.0)       |         | 823 (98.1)         |         | 879 (98.0)           |
| Hypercholesterolemia <sup>c</sup>           | 1       |                      | 1       |                    | 0       |                      |
| Yes                                         |         | 493 (28.4)           |         | 320 (38.2)         |         | 173 (19.3)           |
| No                                          |         | 1242<br>(71.6)       |         | 518 (61.8)         |         | 724 (80.7)           |
| Systolic blood pressure mmHg, mean<br>(SD)  | 48      | 118.2<br>(13.7)      | 16      | 123.4<br>(12.9)    | 32      | 113.2 (12.6)         |
| Systolic blood pressure ≥140 mmHg           | 48      |                      | 16      |                    | 32      |                      |
| Yes                                         |         | 111 (6.6)            |         | 89 (10.8)          |         | 22 (2.5)             |
| No                                          |         | 1577<br>(93.4)       |         | 734 (89.2)         |         | 843 (97.5)           |
| Diastolic blood pressure mmHg, mean<br>(SD) | 48      | 76.7 (9.5)           | 16      | 80.1 (9.0)         | 32      | 73.4 (8.8)           |
| Diastolic blood pressure ≥90 mmHg           | 48      |                      | 16      |                    | 32      |                      |
| Yes                                         |         | 169 (10.0)           |         | 122 (14.8)         |         | 47 (5.4)             |
| No                                          |         | 1519<br>(90.0)       |         | 701 (85.2)         |         | 818 (94.6)           |
| Hypertension status <sup>d</sup>            | 22      |                      | 13      |                    | 9       |                      |
| Yes                                         |         | 298 (17.4)           |         | 206 (24.9)         |         | 92 (10.4)            |
| No                                          |         | 1416<br>(82.6)       |         | 620 (75.1)         |         | 796 (89.6)           |
| Pulse pressure mmHg, mean (SD)              | 48      | 41.5 (8.7)           | 16      | 43.3 (9.2)         | 32      | 39.8 (7.8)           |
| Pulse pressure ≥60 mmHg                     | 48      |                      | 16      |                    | 32      |                      |
| Yes                                         |         | 46 (2.7)             |         | 34 (4.1)           |         | 12 (1.4)             |
| No                                          |         | 1642<br>(97.3)       |         | 789 (95.9)         |         | 853 (98.6)           |
| Waist circumference cm, mean (SD)           | 50      | 84.4 (12.3)          | 17      | 92.2 (9.5)         | 33      | 76.9 (9.6)           |
| High waist circumference <sup>e</sup>       | 50      |                      | 17      |                    | 33      |                      |
| Yes                                         |         | 229 (13.6)           |         | 124 (15.1)         |         | 105 (12.2)           |
| No                                          |         | 1457<br>(86.4)       |         | 698 (84.9)         |         | 759 (87.9)           |



1

2

3

4

5

6

7

8

9

10

11

12

13

14

15

16

17

18

19

20

21

22

23

24

25

26

27

28

29

30

31

32

33

34

35

36

37

38

39

40

41

42

43

44

45

46

47

48

49

50

51

52

53

54

55

56

57

58

59

60

|                                                         |    |             |    |             |    |             |
|---------------------------------------------------------|----|-------------|----|-------------|----|-------------|
| Body Mass Index kg/m <sup>2</sup> , mean (SD)           | 18 | 25.3 (3.9)  | 8  | 26.2 (3.4)  | 10 | 24.4 (4.2)  |
| Body Mass Index ≥25 kg/m <sup>2</sup>                   | 18 |             | 8  |             | 10 |             |
| Yes                                                     |    | 843 (49.1)  |    | 520 (62.6)  |    | 323 (36.4)  |
| No                                                      |    | 875 (50.9)  |    | 311 (37.4)  |    | 564 (63.6)  |
| Alcohol abuse <sup>f</sup>                              | 4  |             | 1  |             | 3  |             |
| Yes                                                     |    | 106 (6.1)   |    | 61 (7.3)    |    | 45 (5.0)    |
| No                                                      |    | 1626 (93.9) |    | 777 (92.7)  |    | 849 (95.0)  |
| Daily smoking                                           | 4  |             | 1  |             | 3  |             |
| Yes                                                     |    | 200 (11.6)  |    | 91 (10.9)   |    | 109 (12.2)  |
| No                                                      |    | 1532 (88.5) |    | 747 (89.1)  |    | 785 (87.8)  |
| Physical activity <sup>g</sup>                          | 4  |             | 1  |             | 3  |             |
| Yes                                                     |    | 898 (51.9)  |    | 465 (55.5)  |    | 433 (48.4)  |
| No                                                      |    | 834 (48.2)  |    | 373 (44.5)  |    | 461 (51.6)  |
| Psychological distress score, mean (STD)                |    |             | 6  | 15.3 (11.4) | 7  | 19.0 (12.5) |
| High psychological distress score <sup>h</sup>          | 13 |             | 6  |             | 7  |             |
| Yes                                                     |    | 381 (22.1)  |    | 143 (17.2)  |    | 238 (26.7)  |
| No                                                      |    | 1342 (77.9) |    | 690 (82.8)  |    | 652 (73.3)  |
| Hours worked per week for the organization              | 24 |             | 13 |             | 11 |             |
| ≤40                                                     |    | 1601 (93.5) |    | 748 (90.6)  |    | 853 (96.3)  |
| > 40                                                    |    | 111 (6.5)   |    | 78 (9.4)    |    | 33 (3.7)    |
| Hours worked per week for another organization          | 30 |             | 10 |             | 20 |             |
| 0                                                       |    | 1477 (86.6) |    | 698 (84.2)  |    | 779 (88.8)  |
| ≥ 1                                                     |    | 229 (13.4)  |    | 131 (15.8)  |    | 98 (11.2)   |
| Employee status, T3 (2015-2018)                         | 2  |             | 1  |             | 1  |             |
| Yes                                                     |    | 507 (29.2)  |    | 230 (27.5)  |    | 277 (30.9)  |
| No                                                      |    | 1222 (70.5) |    | 606 (72.3)  |    | 616 (68.8)  |
| Imprecise                                               |    | 5 (0.3)     |    | 2 (0.24)    |    | 3 (0.33)    |
| Personal history of cardiovascular disease <sup>i</sup> | 8  |             | 1  |             | 7  |             |
| Yes                                                     |    | 101 (5.8)   |    | 54 (6.4)    |    | 47 (5.3)    |
| No                                                      |    | 1627 (94.2) |    | 784 (93.6)  |    | 843 (94.7)  |
| Family history of cardiovascular disease <sup>j</sup>   | 34 |             | 15 |             | 19 |             |
| Yes                                                     |    | 784 (46.1)  |    | 356 (43.2)  |    | 428 (48.8)  |
| No                                                      |    | 897 (52.7)  |    | 460 (55.8)  |    | 437 (49.8)  |
| Don't know                                              |    | 21 (1.23)   |    | 8 (1.0)     |    | 13 (1.5)    |
| Gaziano's predicted cardiovascular risk score           | 53 |             | 18 |             | 35 |             |
| Low                                                     |    |             |    | 639 (77.8)  |    | 814 (94.4)  |
| Moderate or High                                        |    |             |    | 182 (22.2)  |    | 48 (5.6)    |

<sup>a</sup> Canadian dollars

<sup>b</sup>Diabetes was measured by the item "has a doctor ever told you that you have diabetes?"

<sup>c</sup>Hypercholesterolemia was measured by the item "has a doctor, nurse or other health care professional ever told you that your cholesterol level is too high?"

<sup>d</sup>Hypertension status refer to participants who had high BP or those who reported taking medication to lower their blood pressure.

<sup>e</sup> High waist circumference ≥ 88 cm (in women) or ≥ 102 cm (in men)

<sup>f</sup>10 or more drinks a week in women or 15 or more drinks a week in men

<sup>g</sup> Performed leisure physical activity for 20 to 30 minutes per session at least twice a week

<sup>h</sup> Psychological distress score greater than or equal to the highest quintile (score > 26.19)

<sup>i</sup>Personal history of angina pectoris, unstable angina, acute myocardial infarction, coronary bypass surgery, percutaneous coronary intervention, stroke

<sup>j</sup>A member of the immediate family (father, mother, brother, or sister) has had a cardiac medical problem (angina, myocardial infarction, coronary bypass) or a stroke (paralysis, embolism, hemorrhage, thrombosis) under the age of 60 years.

**Table 2.** Arterial stiffness at T3 (2015-2018) in men and women according to main cardiovascular diseases risk factors and psychosocial work-related factor at T2 (1999-2001)

|                                                       | All 1736       |           | Men 839        |            | Women 897      |           |
|-------------------------------------------------------|----------------|-----------|----------------|------------|----------------|-----------|
|                                                       | N <sup>a</sup> | 8.1 (1.7) | N <sup>a</sup> | 8.6 (1.9)  | N <sup>a</sup> | 7.7 (1.4) |
| Age y                                                 |                |           |                |            |                |           |
| <55                                                   | 1602           | 8.0 (1.5) | 750            | 8.4 (1.7)  | 852            | 7.7 (1.3) |
| ≥55                                                   | 134            | 9.7 (2.3) | 89             | 10.0 (2.6) | 45             | 9.1 (1.5) |
| Systolic blood pressure, mmHg                         |                |           |                |            |                |           |
| <140                                                  | 1625           | 8.1 (1.6) | 750            | 8.5 (1.8)  | 875            | 7.7 (1.4) |
| ≥140                                                  | 111            | 9.2 (1.9) | 89             | 9.4 (1.9)  | 22             | 8.7 (1.7) |
| Diastolic blood pressure mmHg                         |                |           |                |            |                |           |
| <90                                                   | 1567           | 8.1 (1.7) | 717            | 8.5 (1.9)  | 850            | 7.7 (1.4) |
| ≥90                                                   | 169            | 8.9 (1.7) | 122            | 9.1 (1.7)  | 47             | 8.4 (1.5) |
| Hypertension status <sup>b</sup>                      |                |           |                |            |                |           |
| Yes                                                   | 298            | 8.9 (1.9) | 206            | 9.2 (2.0)  | 92             | 8.4 (1.6) |
| No                                                    | 1416           | 8.0 (1.6) | 620            | 8.4 (1.8)  | 796            | 7.7 (1.3) |
| High Pulse pressure <sup>c</sup> , (> 60 mmHg)        |                |           |                |            |                |           |
| Yes                                                   | 46             | 9.4 (2.3) | 34             | 9.43 (2.4) | 12             | 9.2 (2.0) |
| No                                                    | 1642           | 8.1 (1.7) | 789            | 8.5 (1.8)  | 853            | 7.7 (1.4) |
| Diabetes <sup>d</sup>                                 |                |           |                |            |                |           |
| Yes                                                   | 34             | 9.7 (3.0) | 16             | 11.3 (3.5) | 18             | 8.3 (1.6) |
| No                                                    | 1702           | 8.1 (1.6) | 823            | 8.5 (1.8)  | 879            | 7.7 (1.4) |
| Hypercholesterolemia <sup>e</sup>                     |                |           |                |            |                |           |
| Yes                                                   | 493            | 8.5 (1.8) | 320            | 8.8 (1.9)  | 173            | 7.9 (1.4) |
| No                                                    | 1242           | 8.0 (1.6) | 518            | 8.4 (1.8)  | 724            | 7.7 (1.4) |
| High waist circumference <sup>f</sup>                 |                |           |                |            |                |           |
| Yes                                                   | 229            | 8.6 (1.8) | 124            | 9.0 (2.1)  | 105            | 8.0 (1.3) |
| No                                                    | 1457           | 8.1 (1.7) | 715            | 8.5 (1.8)  | 792            | 7.7 (1.4) |
| Body Mass Index kg/m <sup>2</sup> , mean (SD)         |                |           |                |            |                |           |
| <25                                                   | 893            | 7.9 (1.5) | 319            | 8.4 (1.7)  | 574            | 7.7 (1.4) |
| ≥25                                                   | 843            | 8.4 (1.8) | 520            | 8.7 (1.9)  | 323            | 7.9 (1.4) |
| Daily smoking                                         |                |           |                |            |                |           |
| Yes                                                   | 200            | 8.3 (1.7) | 91             | 8.7 (1.9)  | 109            | 7.9 (1.4) |
| No                                                    | 1532           | 8.1 (1.7) | 747            | 8.5 (1.8)  | 785            | 7.7 (1.4) |
| Physical activity <sup>g</sup>                        |                |           |                |            |                |           |
| Yes                                                   | 898            | 8.1 (1.7) | 465            | 8.5 (1.8)  | 433            | 7.6 (1.4) |
| No                                                    | 834            | 8.2 (1.7) | 373            | 8.7 (1.9)  | 461            | 7.8 (1.4) |
| Gaziano's predicted cardiovascular risk score         |                |           |                |            |                |           |
| Low                                                   | 1453           | 7.9 (1.5) | 639            | 8.3 (1.6)  | 814            | 7.7 (1.3) |
| Moderate or High                                      | 230            | 9.5 (2.1) | 182            | 9.6 (2.2)  | 48             | 9.1 (1.6) |
| Number of accumulated cardiovascular risk factors     |                |           |                |            |                |           |
| 0-1                                                   | 1489           | 8.0 (1.6) | 690            | 8.4 (1.7)  | 799            | 7.7 (1.4) |
| 2+                                                    | 194            | 9.1 (2.1) | 131            | 9.4 (2.3)  | 63             | 8.4 (1.6) |
| Family history of cardiovascular disease <sup>h</sup> |                |           |                |            |                |           |
| Yes                                                   | 784            | 8.2 (1.7) | 356            | 8.6 (1.9)  | 428            | 7.8 (1.4) |
| No                                                    | 897            | 8.1 (1.6) | 460            | 8.5 (1.8)  | 437            | 7.6 (1.3) |
| Don't know                                            | 21             | 7.7 (1.8) | 8              | 8.4 (2.5)  | 13             | 7.3 (1.2) |
| Job strain                                            |                |           |                |            |                |           |
| Low strain                                            | 298            | 8.3 (1.8) | 174            | 8.7 (1.9)  | 124            | 7.8 (1.4) |
| Passive                                               | 592            | 8.1 (1.7) | 237            | 8.6 (1.8)  | 355            | 7.7 (1.5) |
| Active                                                | 486            | 8.2 (1.8) | 280            | 8.4 (2.0)  | 206            | 7.8 (1.4) |
| High strain                                           | 344            | 8.0 (1.4) | 141            | 8.5 (1.6)  | 203            | 7.6 (1.2) |
| Effort-reward imbalance                               |                |           |                |            |                |           |
| Yes                                                   | 408            | 8.2 (1.7) | 197            | 8.6 (1.9)  | 211            | 7.8 (1.4) |
| No                                                    | 1281           | 8.1 (1.7) | 618            | 8.6 (1.9)  | 663            | 7.7 (1.4) |

Arterial stiffness (m/s) in different subgroups are presented as mean and standard deviation (SD)

aThe number of observations used

b Hypertension status refer to participants who had high BP or those who reported taking medication to lower their blood pressure.

cPulse pressure = systolic blood pressure – diastolic blood pressure

dDiabetes was measured by the item "has a doctor ever told you that you have diabetes?"

eHypercholesterolemia was measured by the item "has a doctor, nurse or other health care professional ever told you that your cholesterol level is too high?"

fHigh waist circumference: ≥ 88 cm (in women) or ≥ 102 cm (in men)

g Performed leisure physical activity for 20 to 30 minutes per session at least twice a week

h A member of the immediate family (father, mother, brother, or sister) has had a cardiac medical problem (angina, myocardial infarction, coronary bypass) or a stroke (paralysis, embolism, hemorrhage, thrombosis) under the age of 60 years.

**Table 3.** Arterial stiffness (m/s) mean differences at T3 (2015-2018) and 95% confidence intervals according to psychosocial work-related factors at T2 (1999-2001) in men and women

|                                         | Modele I             | Modele II           | Modele III          | Modele IV            |
|-----------------------------------------|----------------------|---------------------|---------------------|----------------------|
| <b>Job strain in men</b>                |                      |                     |                     |                      |
| Missing values/785 observations read    | 6                    | 28                  | 55                  | 79                   |
| Low strain                              | Ref.                 | Ref.                | Ref.                | Ref.                 |
| Passive                                 | +0.04 (-0.26;+0.33)  | +0.11 (-0.19;+0.41) | +0.16 (-0.15;+0.47) | +0.19 (-0.13;+0.51)  |
| Active                                  | -0.11 (-0.51;+0.29)  | -0.14 (-0.50;+0.23) | -0.14 (-0.51;+0.23) | -0.05 (-0.42;+0.31)  |
| High job strain                         | -0.07 (-0.68;+0.53)  | +0.04 (-0.50;+0.58) | -0.05 (-0.61;+0.51) | -0.02 (-0.55;+0.50)  |
| <b>Job strain in women</b>              |                      |                     |                     |                      |
| Missing values /850 observations read   | 9                    | 44                  | 86                  | 110                  |
| Low strain                              | Ref.                 | Ref.                | Ref.                | Ref.                 |
| Passive                                 | -0.09 (-0.35;+0.18)  | -0.21 (-0.44;+0.02) | -0.20 (-0.42;+0.03) | -0.23 (-0.47;+0.00)  |
| Active                                  | -0.03 (-0.31;+0.24)  | -0.06 (-0.31;+0.18) | -0.03 (-0.30;+0.24) | -0.11 (-0.39;+0.16)  |
| High job strain                         | -0.14 (-0.47;+0.20)  | -0.25 (-0.54;+0.03) | -0.20 (-0.53;+0.13) | -0.27 (-0.59;+0.06)  |
| <b>Effort-Reward Imbalance in men</b>   |                      |                     |                     |                      |
| Missing values /785 observations read   | 22                   | 44                  | 68                  | 79                   |
| ERI (categorical variable)              |                      |                     |                     |                      |
| No                                      | Ref.                 | Ref.                | Ref.                | Ref.                 |
| Yes                                     | +0.13 (-0.22;+0.47)  | +0.02 (-0.27;+0.31) | -0.07 (-0.39;+0.24) | -0.04 (-0.35;+ 0.28) |
| ERI (continuous variable)               | +0.21 (-0.75;+1.17)  | -0.06 (-0.89;+0.76) | -0.27 (-1.19;+0.66) | -0.16 (-1.20;+0.89)  |
| <b>Effort-Reward Imbalance in women</b> |                      |                     |                     |                      |
| Missing values /850 observations read   | 21                   | 53                  | 94                  | 110                  |
| ERI                                     |                      |                     |                     |                      |
| No                                      | Ref.                 | Ref.                | Ref.                | Ref.                 |
| Yes                                     | +0.13 (-0.14;+ 0.39) | +0.05 (-0.16;+0.27) | +0.13 (-0.10;+0.36) | +0.18 (-0.08;+ 0.43) |
| ERI (continuous form)                   | +0.17 (-0.36;+0.69)  | -0.04 (-0.46;+0.38) | +0.12 (-0.25;+0.49) | +0.18 (-0.28;+0.64)  |

Model I: unadjusted;

Model II: I+ age, education, income, marital status, children, familial history of cardiovascular disease at time T2 (1999-2001)

Model III: II+ systolic blood pressure (mmHg), diastolic blood pressure (mmHg), diabetes, hypercholesterolemia, body mass index (Kg/m<sup>2</sup>), waist circumference (cm), lifestyle (alcohol abuse, daily smoking, physical activity), psychological distress score at time T2.

Model IV: III+ hours worked per week for the organization, hours worked per week for another organization, effort-reward imbalance (when studying the effect of job strain) or job strain (when studying the effect of effort-reward imbalance) at time T2.

Models are restricted to people with no personal history of cardiovascular disease at time T2.

ERI: effort-reward imbalance

**Table 4.** Arterial stiffness (m/s) mean differences at T3 (2015-2018) and 95% confidence intervals according to psychosocial work-related factors at T2 (1999-2001) stratified by blood pressure at the time of exposure

|                              | Systolic Blood pressure, mmHg |                            | Diastolic Blood pressure, mmHg |                            | Pulse pressure, mmHg |                            |
|------------------------------|-------------------------------|----------------------------|--------------------------------|----------------------------|----------------------|----------------------------|
|                              | <140                          | ≥140                       | <90                            | ≥90                        | ≤60                  | > 60                       |
| Missing/observations read    | 174/1529                      | 15/106                     | 166/1476                       | 23/159                     | 139/1546             | 4/43                       |
| <b>Job strain</b>            |                               |                            |                                |                            |                      |                            |
| Low strain                   | Ref.                          | Ref.                       | Ref.                           | Ref.                       | Ref.                 | Ref.                       |
| Passive                      | -0.02 (-0.23;+0.19)           | -0.27 (-1.28;+0.74)        | -0.05 (-0.28;+0.18)            | +0.03 (-0.72;+0.79)        | -0.06 (-0.27;+0.14)  | +1.54 (-0.47;+3.55)        |
| Active                       | -0.05 (-0.28;+0.18)           | -0.13 (-1.05;+0.80)        | -0.08 (-0.33;+0.16)            | +0.43 (-0.18;+1.04)        | -0.09 (-0.31;+0.13)  | <b>+2.06 (+0.69;+3.44)</b> |
| High job strain              | -0.17 (-0.40;+0.07)           | +0.84 (-0.35;+2.03)        | <b>-0.25 (-0.48;-0.02)</b>     | <b>+1.38 (+0.57;+2.19)</b> | -0.16 (-0.40;+0.08)  | <b>+3.00 (+1.18;+4.76)</b> |
| Missing/observations read    | 174/1529                      | 15/106                     | 166/1476                       | 23/159                     | 139/1546             | 4/43                       |
| <b>ERI</b>                   |                               |                            |                                |                            |                      |                            |
| No                           | Ref.                          | Ref.                       | Ref.                           | Ref.                       | Ref.                 | Ref.                       |
| Yes                          | +0.13 (-0.08;+0.34)           | <b>-1.17 (-2.12;-0.22)</b> | +0.11 (-0.12;+0.35)            | -0.48 (-1.10;+0.14)        | +0.08 (-0.10;+0.27)  | <b>-2.06 (-3.33;-0.79)</b> |
| <b>ERI (continuous form)</b> | -0.02 (-0.55;+0.50)           | +0.66 (-1.44;+2.77)        | -0.04 (-0.57;+0.50)            | -0.34 (-1.99;+1.31)        | -0.04 (-0.56;+0.48)  | +0.43 (-4.69;+5.55)        |

Models are adjusted for sex and covariates at time T2 (age, education, income, marital status, children, systolic blood pressure (mmHg), diastolic blood pressure (mmHg), diabetes, hypercholesterolemia, body mass index (Kg/m<sup>2</sup>), waist circumference (cm), alcohol abuse, daily smoking, physical activity, familial history of cardiovascular disease, psychological distress, hours worked per week for the organization, hours worked per week for another organization, ERI (when studying the effect of job strain) or job strain (when studying the effect of ERI).

Models are restricted to people with no personal history of cardiovascular disease at time T2 (1999-2001).

Pulse pressure = systolic blood pressure – diastolic blood pressure

ERI: effort-reward imbalance

## References

1. O'Rourke MF, Safar ME, Dzau V. The Cardiovascular Continuum extended: Aging effects on the aorta and microvasculature. *Vascular Medicine*. 2010;15(6):461-8.
2. Belkic K, Landsbergis P, Schnall P, Baker D. Is job strain a major source of cardiovascular disease risk? *SCANDINAVIAN JOURNAL OF WORK ENVIRONMENT & HEALTH*. 2004;30(2):85-128
3. Brisson C, Aboa-Eboulé C, Leroux I, Gilbert-Ouimet M, Vézina M, Bourbonnais R, et al. Work-related psychosocial factors and heart disease. *Heart and mind: The practice of cardiac psychology* (2nd ed). Washington, DC, US: American Psychological Association; 2011. p. 269-85.
4. Vlachopoulos C, Aznaouridis K, Stefanadis C. Prediction of cardiovascular events and all-cause mortality with arterial stiffness. A systematic review and meta-analysis. *Journal of the American College of Cardiology*. 2010;55:1318-27.
5. Michikawa T, Nishiwaki Y, Nomiya T, Uemura T, O'Uchi T, Sakurai H, et al. Job strain and arteriosclerosis in three different types of arteries among male Japanese factory workers. *Scandinavian Journal of Work, Environment & Health*. 2008;34(1):48-54.
6. Utsugi M, Saijo Y, Yoshioka E, Sato T, Horikawa N, Gong Y, et al. Relationship between two alternative occupational stress models and arterial stiffness: a cross-sectional study among Japanese workers. *Int Arch Occup Environ Health*. 2009;82(2):175-83.
7. Xiu JF, Zheng L, Wang G, Zou L, Li J. THE RELATIONSHIP BETWEEN CHRONIC OCCUPATIONAL STRESS AND ARTERIAL STIFFNESS: A CROSS-SECTIONAL STUDY IN CHINESE WORKERS. *Heart*. 2012;98(Suppl 2):E286.
8. Kaewboonchoo O, Sembajwe G, Li J. Associations between Job Strain and Arterial Stiffness: A Large Survey among Enterprise Employees from Thailand. *Int J Environ Res Public Health*. 2018;15(4).
9. Yook Y-S. Firefighters' occupational stress and its correlations with cardiorespiratory fitness, arterial stiffness, heart rate variability, and sleep quality. *PloS one*. 2019;14(12):e0226739-e.
10. Nomura K, Nakao M, Karita K, Nishikitani M, Yano E. Association between work-related psychological stress and arterial stiffness measured by brachial-ankle pulse-wave velocity in young Japanese males from an information service company. *Scand J Work Environ Health*. 2005;31(5):352-9.
11. Chou L-P, Li C-Y, Hu SC. Work-Related Psychosocial Hazards and Arteriosclerosis A Cross-Sectional Study Among Medical Employees in a Regional Hospital in Taiwan. *International Heart Journal*. 2015;56(6):644-50.
12. Webb AJS. Progression of Arterial Stiffness is Associated With Midlife Diastolic Blood Pressure and Transition to Late-Life Hypertensive Phenotypes. *Journal of the American Heart Association*. 2020;9(1):e014547.
13. Karasek R, Brisson C, Kawakami N, Houtman I, Bongers P, Amick B. The Job Content Questionnaire (JCQ): An Instrument for Internationally Comparative Assessments of Psychosocial Job Characteristics. *Journal of Occupational Health Psychology*. 1998;3(4):322-55.
14. Karasek R, Schwartz J, Pieper C. Validation of a Survey Instrument for Job-Related Cardiovascular Illness. New York, NY: Department of Industrial Engineering and Operations Research, Columbia University. 1983.
15. Brisson C, Blanchette C, Guimont C, Dion G, Moisan J, Vézina M, et al. Reliability and validity of the French version of the 18-item Karasek job content questionnaire. *Work & Stress: An International Journal of Work, Health & Organisations*. 1998;12(4):322-36.

16. Niedhammer I, Siegrist J, Landre M, Goldberg M, Leclerc A. Étude des qualités psychométriques de la version française du modèle du Déséquilibre Efforts/Récompenses. *Revue d'épidémiologie et de santé publique*. 2000;48:419-37.
17. Karasek R, Gordon G, Pietrokovsky C, Frese M, Pieper C, Schwartz J, et al. Job content questionnaire: Questionnaire and users' guide. Lowell: University of Massachusetts.1985.
18. Aboa-Éboulé C, Brisson C, Blanchette C, Maunsell E, Bourbonnais R, Abdous B, et al. Effort-reward imbalance at work and psychological distress: a validation study of post-myocardial infarction patients. *Psychosomatic medicine*. 2011;73(6):448.
19. Di Iorio BR, Cucciniello E, Alinei P, Torraca S. Reproducibility of regional pulse-wave velocity in uremic subjects. *Hemodialysis international International Symposium on Home Hemodialysis*. 2010;14(4):441-6.
20. Zeger SL, Liang KY. Longitudinal data analysis for discrete and continuous outcomes. *Biometrics*. 1986;42(1):121-30.
21. Gaziano TA, Young CR, Fitzmaurice G, Atwood S, Gaziano JM. Laboratory-based versus non-laboratory-based method for assessment of cardiovascular disease risk: the NHANES I Follow-up Study cohort. *Lancet (London, England)*. 2008;371(9616):923-31.
22. Kivimäki M, Pentti J, Ferrie JE, Batty GD, Nyberg ST, Jokela M, et al. Work stress and risk of death in men and women with and without cardiometabolic disease: a multicohort study. *Lancet Diabetes Endocrinol*. 2018;6(9):705-13.
23. Kivimäki M, Theorell T, Westerlund H, Vahtera J, Alfredsson L. Job strain and ischaemic disease: does the inclusion of older employees in the cohort dilute the association? The WOLF Stockholm Study. *Journal of epidemiology and community health*. 2008;62(4):372-4.
24. Franklin S, Larson M, Khan S, Wong N, Leip E, Kannel W, et al. Does the Relation of Blood Pressure to Coronary Heart Disease Risk Change With Aging? The Framingham Heart Study. *Circulation*. 2001;103: 1245-9.
25. Laurent S, Boutouyrie P. Arterial Stiffness and Hypertension in the Elderly. *Frontiers in Cardiovascular Medicine*. 2020;7(202).
26. Massamba VK, Talbot D, Milot A, Pearce N, Trudel X, Brisson C. Assessment of the healthy worker survivor effect in the relationship between psychosocial work-related factors and hypertension. *Occup Environ Med*. 2019;76(6):414-21.
27. Wang M, Monticone RE, McGraw KR. Proinflammatory Arterial Stiffness Syndrome: A Signature of Large Arterial Aging. *J Vasc Res*. 2018;55(4):210-23.
28. LaRocca TJ, Martens CR, Seals DR. Nutrition and other lifestyle influences on arterial aging. *Ageing Res Rev*. 2017;39:106-19.
29. Vasan RS, Short MI, Niiranen TJ, Xanthakis V, DeCarli C, Cheng S, et al. Interrelations Between Arterial Stiffness, Target Organ Damage, and Cardiovascular Disease Outcomes. *Journal of the American Heart Association*. 2019;8(14):e012141.
30. Al Mheid I, Hayek SS, Ko YA, Akbik F, Li Q, Ghasemzadeh N, et al. Age and Human Regenerative Capacity Impact of Cardiovascular Risk Factors. *Circulation research*. 2016;119(7):801-9.

1  
2  
3  
4  
5  
6  
7  
8  
9  
10  
11  
12  
13  
14  
15  
16  
17  
18  
19  
20  
21  
22  
23  
24  
25  
26  
27  
28  
29  
30  
31  
32  
33  
34  
35  
36  
37  
38  
39  
40  
41  
42  
43  
44  
45  
46  
47  
48  
49  
50  
51  
52  
53  
54  
55  
56  
57  
58  
59  
60

Figure 1. Flow chart

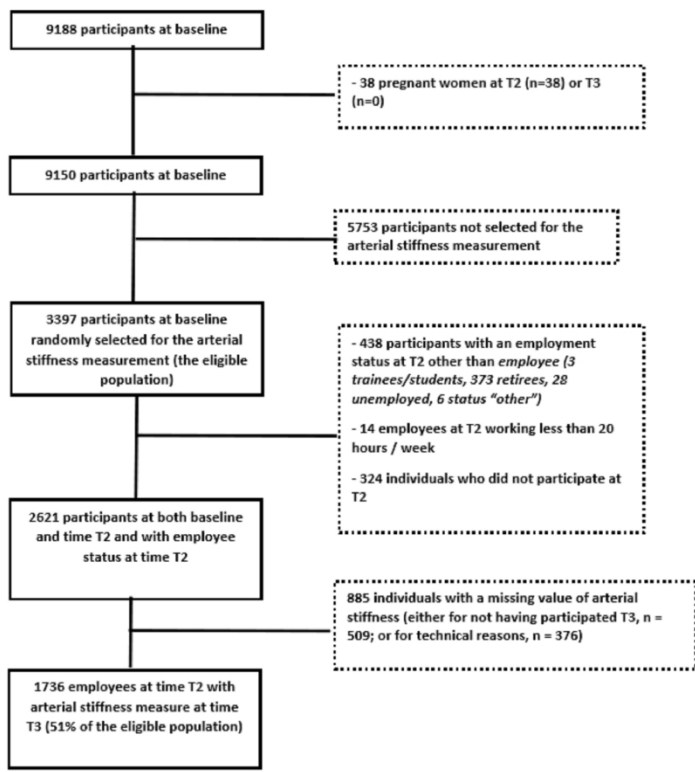

Baseline: 1991-1993; T2: 1999-2001; T3: 2015-2018

219x283mm (300 x 300 DPI)

Article \_ supplement Association between psychosocial work-related factors exposures assessed at midlife and arterial stiffness at older age among 1,736 white-collar workers

Table S1. Arterial stiffness (cfPWV in m/s) mean differences at time T3 and 95% confidence intervals according to work-related psychosocial factors (job strain and effort-reward imbalance) at time T2 stratified by age and Gaziano's predicted cardiovascular risk at the time of exposure

|                              | Age, years          |                     | Gaziano's predicted cardiovascular risk |                     |
|------------------------------|---------------------|---------------------|-----------------------------------------|---------------------|
|                              | <55                 | ≥55                 | Weak                                    | Moderate or high    |
| Missing/observations read    | 162/1523            | 27/112              | 110/1383                                | 28/201              |
| <b>Job strain</b>            |                     |                     |                                         |                     |
| Low strain                   | Ref.                | Ref.                | Ref.                                    | Ref.                |
| Passive                      | -0.06 (-0.29;+0.17) | +0.25 (-0.74;+1.23) | -0.10 (-0.33;+0.13)                     | +0.30 (-0.34;+0.94) |
| Active                       | -0.07 (-0.31;+0.17) | +0.26 (-0.68;+1.21) | -0.08 (-0.33;+0.17)                     | +0.16 (-0.40;+0.72) |
| High job strain              | -0.11 (-0.35;+0.14) | +0.55 (-1.23;+2.34) | -0.13 (-0.37;+0.11)                     | +0.24 (-0.55;+1.03) |
| Missing/observations read    | 162/1523            | 27/112              | 110/1383                                | 28/201              |
| <b>ERI</b>                   |                     |                     |                                         |                     |
| No                           | Ref.                | Ref.                | Ref.                                    | Ref.                |
| Yes                          | +0.06 (-0.13;+0.25) | +0.52 (-0.67;+1.71) | +0.08 (-0.11;+0.28)                     | -0.20 (-0.77;+0.37) |
| <b>ERI (continuous form)</b> | +0.04 (-0.46;+0.54) | -0.32 (-3.25;+2.62) | +0.04 (-0.53;+0.60)                     | -0.21 (-1.54;+1.12) |

Models are adjusted for sex and covariates at time T2 (age, education, income, marital status, children, systolic blood pressure (mmHg), diastolic blood pressure (mmHg), diabetes, hypercholesterolemia, BMI, waist circumference (cm), alcohol abuse, daily smoking, physical activity, familial history of cardiovascular disease, psychological distress, hours worked per week for the organization, hours worked per week for another organization, ERI (when studying the effect of job strain) or job strain (when studying the effect of ERI)).

Models are restricted to people with no personal history of cardiovascular disease at time T2/T3.

ERI: effort-reward imbalance

cfPWV: carotid-femoral pulse wave velocity

Time T2: 1999-2001; time T3: 2015-2018

The Gaziano's predicted cardiovascular risk is a non-laboratory-based method for assessment of cardiovascular disease using the following cardiovascular risk factors: sex, age, diabetes, systolic blood pressure, smoking and body mass index (1, 2)



Article \_ supplement Association between psychosocial work-related factors exposures assessed at midlife and arterial stiffness at older age among 1,736 white-collar workers

Table S2a. Arterial stiffness (cfPWV in m/s) mean differences at time T3 and 95% confidence intervals according to work-related psychosocial factors (job strain and effort-reward imbalance) at time T2 stratified by employment status at the time of arterial stiffness measurement (fully adjusted model\*)

|                              | Employees           | Non-employees       |
|------------------------------|---------------------|---------------------|
| Missing/observations read    | 49/492              | 139/1137            |
| <b>Job strain</b>            |                     |                     |
| Low strain                   | Ref                 | Ref                 |
| Passive                      | -0.04 (-0.24;+0.16) | -0.05 (-0.28;+0.19) |
| Active                       | -0.18 (-0.52;+0.16) | +0.04 (-0.29;+0.36) |
| High job strain              | +0.00 (-0.33;+0.34) | -0.14 (-0.41;+0.13) |
| Missing/observations read    | 49/492              | 139/1137            |
| <b>ERI</b>                   |                     |                     |
| No                           | Ref                 | Ref                 |
| Yes                          | +0.13 (-0.12;+0.37) | +0.05 (-0.23;+0.34) |
| <b>ERI (continuous form)</b> | +0.43 (-0.33;+1.18) | -0.04 (-0.70;+0.61) |

\*The model is adjusted for covariates at time T2 (age, education, income, marital status, having at least on child, systolic blood pressure, diastolic blood pressure, diabetes, hypercholesterolemia, body mass index, waist circumference, alcohol abuse, daily smoking, physical activity, familial history of CVD, psychological distress, hours worked per week for the organization, hours worked per week for another organization, effort-reward imbalance (when studying the effect of job strain) or job strain (when studying the effect of effort-reward imbalance).) and for gender  
 People with personal history of cardiovascular events at time T2 are not included.  
 ERI: effort-reward imbalance  
 The category of people with imprecise employment status was excluded from stratification given a low size.  
 Time T2: 1999-2001; time T3: 2015-2018

Article \_ supplement Association between psychosocial work-related factors exposures assessed at midlife and arterial stiffness at older age among 1,736 white-collar workers

Table S2b. Arterial stiffness (m/s) mean differences at time T3 and 95% confidence intervals according to work-related psychosocial factors (job strain and effort-reward imbalance) at time T2 in participants with the status of retired in time T3 according to the duration of the retirement (fully adjusted model\*)

|                              | The duration of the retirement |                      |
|------------------------------|--------------------------------|----------------------|
|                              | ≤ 2 years                      | > 2 years            |
| Missing/observations read    | 34/293                         | 90/778               |
| <b>Job strain</b>            |                                |                      |
| Low strain                   | Ref.                           | Ref.                 |
| Passive                      | +0.07 (-0.34;+0.49)            | -0.10 (-0.40;+0.19)  |
| Active                       | -0.14 (-0.54;+0.27)            | -0.04 (-0.36;+0.29)  |
| High job strain              | -0.24 (-0.69;+0.22)            | -0.20 (-0.58;+0.19)  |
| Missing/observations read    | 34/293                         | 90/778               |
| <b>ERI</b>                   |                                |                      |
| No                           | Ref                            | Ref                  |
| Yes                          | +0.03 (-0.30;+0.35)            | +0.20 (-0.14;+0.55)  |
| <b>ERI (continuous form)</b> | -0.26 (-0.91;+0.38)            | +0.29 (-0.61 ;+1.19) |

The model is adjusted for covariates at time T2 (age, education, income, marital status, having at least on child, systolic blood pressure, diastolic blood pressure, diabetes, hypercholesterolemia, body mass index, waist circumference, alcohol abuse, daily smoking, physical activity, familial history of CVD, psychological distress, hours worked per week for the organization, hours worked per week for another organization, effort-reward imbalance (when studying the effect of job strain) or job strain (when studying the effect of effort-reward imbalance)) and for gender

People with personal history of cardiovascular events at time T2 are not included.

ERI: effort-reward imbalance

Time T2: 1999-2001; time T3: 2015-2018

Article \_ supplement Association between psychosocial work-related factors exposures assessed at midlife and arterial stiffness at older age among 1,736 white-collar workers

Table S3. Arterial stiffness (m/s) mean differences at time T3 and 95% confidence intervals according to work-related psychosocial factors (job strain and effort-reward imbalance) at time T2 with and without participants with personal history of cardiovascular events\* at baseline (fully adjusted models)

| Exposure                                | With individuals with personal history of CVD at T2 (Model A) | Without individuals with personal history of CVD at T2 (Model B) |
|-----------------------------------------|---------------------------------------------------------------|------------------------------------------------------------------|
| <b>Job strain in men</b>                |                                                               |                                                                  |
| Low strain                              | Ref.                                                          | Ref.                                                             |
| Passive                                 | +0.21 (-0.10;+0.51)                                           | +0.19 (-0.13;+0.51)                                              |
| Active                                  | -0.11 (-0.45;+0.24)                                           | -0.05 (-0.42;+0.31)                                              |
| High job strain                         | -0.02 -0.57;+0.52)                                            | -0.02 (-0.55;+0.50)                                              |
| <b>Job strain in women</b>              |                                                               |                                                                  |
| Low strain                              | Ref.                                                          | Ref.                                                             |
| Passive                                 | -0.18 (-0.40;+0.05)                                           | -0.23 (-0.47;+0.00)                                              |
| Active                                  | -0.03 (-0.34;+0.28)                                           | -0.11 (-0.39;+0.16)                                              |
| High job strain                         | <b>-0.30 (-0.57;-0.02)</b>                                    | -0.27 (-0.59;+0.06)                                              |
| <b>Effort-reward imbalance in men</b>   |                                                               |                                                                  |
| No                                      | Ref.                                                          | Ref.                                                             |
| Yes                                     | -0.09 (-0.43;+ 0.26)                                          | -0.04 (-0.35;+ 0.28)                                             |
| <b>Effort-reward imbalance in women</b> |                                                               |                                                                  |
| No                                      | Ref.                                                          | Ref.                                                             |
| Yes                                     | +0.22 (-0.10;+ 0.53)                                          | +0.18 (-0.08;+ 0.43)                                             |

\* Cardiovascular events: angina pectoris, acute myocardial infarction, coronary bypass surgery, dilation  
 Model A includes covariates at time T2 (age, education, income, marital status, having at least on child, systolic blood pressure, diastolic blood pressure, diabetes, hypercholesterolemia, body mass index, waist circumference, alcohol abuse, daily smoking, physical activity, familial history of CVD, personal history of CVD , psychological distress, hours worked per week for the organization, hours worked per week for another organization, effort-reward imbalance (when studying the effect of job strain) or job strain (when studying the effect of effort-reward imbalance).).  
 Model B= Model A without participants with personal history of cardiovascular events at time T2 (n=101)  
 Baseline: 1991-1993; time T2: 1999-2001; time T3: 2015-2018

Article \_ supplement Association between psychosocial work-related factors exposures assessed at midlife and arterial stiffness at older age among 1,736 white-collar workers

Table S4. Arterial stiffness (m/s) mean differences at time T3 and 95% confidence intervals according to work-related psychosocial factors (job strain and effort-reward imbalance) at time T2 before and after correction for selection bias (fully adjusted models\*)

|                              | Men                  |                     |                     | Women                |                     |                     |
|------------------------------|----------------------|---------------------|---------------------|----------------------|---------------------|---------------------|
|                              | No imputation        | 42 imputations      | IPW                 | No imputations       | 42 imputations      | IPW                 |
| <b>Job strain at T2</b>      |                      |                     |                     |                      |                     |                     |
| Low strain                   | Ref.                 | Ref.                | Ref.                | Ref.                 | Ref.                | Ref.                |
| Passive                      | +0.19 (-0.13;+0.51)  | +0.10 (-0.19;+0.39) | +0.10 (-0.27;+0.47) | -0.23 (-0.47;+0.00)  | -0.19 (-0.44;+0.06) | -0.12 (-0.49;+0.24) |
| Active                       | -0.05 (-0.42;+0.31)  | -0.06 (-0.39;+0.28) | +0.01 (-0.43;+0.44) | -0.11 (-0.39;+0.16)  | -0.10 (-0.37;+0.16) | -0.08 (-0.49;+0.33) |
| High job strain              | -0.02 (-0.55;+0.50)  | -0.07 (-0.50;+0.36) | -0.05 (-0.59;+0.48) | -0.27 (-0.59;+0.06)  | -0.25 (-0.59;+0.09) | -0.23 (-0.60;+0.14) |
| <b>ERI</b>                   |                      |                     |                     |                      |                     |                     |
| No                           | Ref.                 | Ref.                | Ref.                | Ref.                 | Ref.                | Ref.                |
| Yes                          | -0.04 (-0.35;+ 0.28) | +0.07 (-0.18;+0.32) | +0.21 (-0.11;+0.55) | +0.18 (-0.08;+ 0.43) | +0.09 (-0.13;+0.31) | +0.07 (-0.22;+0.36) |
| <b>ERI (continuous form)</b> | -0.16 (-1.20;+0.89)  | +0.25 (-0.64;+1.14) | +0.29 (-0.72;+1.30) | +0.18 (-0.28;+0.64)  | +0.13 (-0.43;+0.69) | +0.09 (-0.62;+0.80) |

\*Models are adjusted for covariates at time T2 (age, education, income, marital status, having at least on child, systolic blood pressure, diastolic blood pressure, diabetes, hypercholesterolemia, body mass index, waist circumference, alcohol abuse, daily smoking, physical activity, familial history of CVD, psychological distress, hours worked per week for the organization, hours worked per week for another organization, effort-reward imbalance (when studying the effect of job strain) or job strain (when studying the effect of effort-reward imbalance)).

Models are restricted to people with no personal history of cardiovascular events at time T2

ERI: effort-reward imbalance

IPW: inverse probability weighting

Time T2: 1999-2001; time T3: 2015-2018

Article \_ supplement Association between psychosocial work-related factors exposures assessed at midlife and arterial stiffness at older age among 1,736 white-collar workers

Figure S1. Possible sequences of events between chronic exposure to psychosocial work-related factors and the development of cardiovascular diseases, based on the cardiovascular continuum

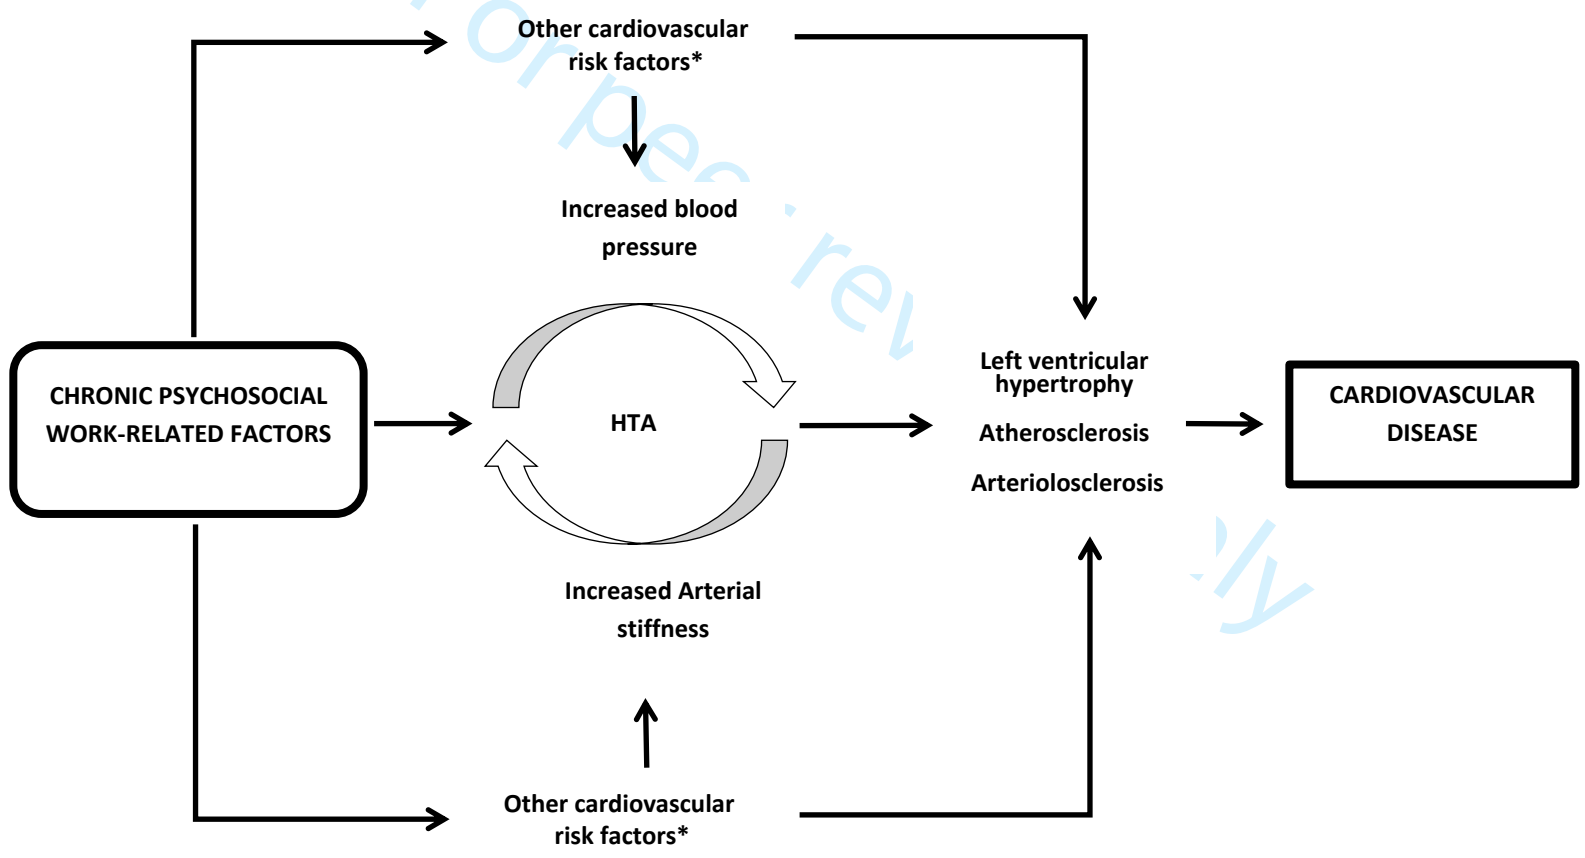

\* Adiposity, smoking, alcohol abuse, excessive salt intake, physical inactivity, dyslipidemia, diabetes, mental health, chronic inflammation.

1 Article \_ supplement Association between psychosocial work-related factors exposures assessed at midlife and arterial stiffness at  
2 older age among 1,736 white-collar workers  
3  
4

### 5 **References**

- 6  
7 1. Gaziano TA, Young CR, Fitzmaurice G, Atwood S, Gaziano JM. Laboratory-based versus non-laboratory-based method for assessment of  
8 cardiovascular disease risk: the NHANES I Follow-up Study cohort. *Lancet* (London, England). 2008;371(9616):923-31.  
9 2. Pandya A, Weinstein MC, Gaziano TA. A comparative assessment of non-laboratory-based versus commonly used laboratory-based  
10 cardiovascular disease risk scores in the NHANES III population. *PloS one*. 2011;6(5):e20416-e.  
11  
12  
13  
14  
15  
16  
17  
18  
19  
20  
21  
22  
23  
24  
25  
26  
27  
28  
29  
30  
31  
32  
33  
34  
35  
36  
37  
38  
39  
40  
41  
42  
43  
44  
45  
46  
47

For peer review only

STROBE Statement—Checklist of items that should be included in reports of *cohort studies*

|                              | Item No | Recommendation                                                                                                                                                                                                                                                                                                         | Page No                          |
|------------------------------|---------|------------------------------------------------------------------------------------------------------------------------------------------------------------------------------------------------------------------------------------------------------------------------------------------------------------------------|----------------------------------|
| <b>Title and abstract</b>    | 1       | (a) Indicate the study's design with a commonly used term in the title or the abstract<br>(b) Provide in the abstract an informative and balanced summary of what was done and what was found                                                                                                                          | 1;2<br>2                         |
| <b>Introduction</b>          |         |                                                                                                                                                                                                                                                                                                                        |                                  |
| Background/rationale         | 2       | Explain the scientific background and rationale for the investigation being reported                                                                                                                                                                                                                                   | 4                                |
| Objectives                   | 3       | State specific objectives, including any prespecified hypotheses                                                                                                                                                                                                                                                       | 4                                |
| <b>Methods</b>               |         |                                                                                                                                                                                                                                                                                                                        |                                  |
| Study design                 | 4       | Present key elements of study design early in the paper                                                                                                                                                                                                                                                                | 5                                |
| Setting                      | 5       | Describe the setting, locations, and relevant dates, including periods of recruitment, exposure, follow-up, and data collection                                                                                                                                                                                        | 5                                |
| Participants                 | 6       | (a) Give the eligibility criteria, and the sources and methods of selection of participants. Describe methods of follow-up<br>(b) For matched studies, give matching criteria and number of exposed and unexposed                                                                                                      | 5                                |
| Variables                    | 7       | Clearly define all outcomes, exposures, predictors, potential confounders, and effect modifiers. Give diagnostic criteria, if applicable                                                                                                                                                                               | 5;6;7                            |
| Data sources/<br>measurement | 8*      | For each variable of interest, give sources of data and details of methods of assessment (measurement). Describe comparability of assessment methods if there is more than one group                                                                                                                                   | 5;6                              |
| Bias                         | 9       | Describe any efforts to address potential sources of bias                                                                                                                                                                                                                                                              | 7                                |
| Study size                   | 10      | Explain how the study size was arrived at                                                                                                                                                                                                                                                                              | 5                                |
| Quantitative variables       | 11      | Explain how quantitative variables were handled in the analyses. If applicable, describe which groupings were chosen and why                                                                                                                                                                                           | 7                                |
| Statistical methods          | 12      | (a) Describe all statistical methods, including those used to control for confounding<br>(b) Describe any methods used to examine subgroups and interactions<br>(c) Explain how missing data were addressed<br>(d) If applicable, explain how loss to follow-up was addressed<br>(e) Describe any sensitivity analyses | 7<br>7<br>7;8<br>7;8<br>7        |
| <b>Results</b>               |         |                                                                                                                                                                                                                                                                                                                        |                                  |
| Participants                 | 13*     | (a) Report numbers of individuals at each stage of study—eg numbers potentially eligible, examined for eligibility, confirmed eligible, included in the study, completing follow-up, and analysed<br>(b) Give reasons for non-participation at each stage<br>(c) Consider use of a flow diagram                        | Figure 1<br>Figure 1<br>Figure 1 |
| Descriptive data             | 14*     | (a) Give characteristics of study participants (eg demographic, clinical, social) and information on exposures and potential confounders<br>(b) Indicate number of participants with missing data for each variable of interest<br>(c) Summarise follow-up time (eg, average and total amount)                         | 8;14<br>14;<br>Figure 1<br>8     |
| Outcome data                 | 15*     | Report numbers of outcome events or summary measures over time                                                                                                                                                                                                                                                         | 8;16                             |

|    |                          |    |                                                                                                                                                                                                              |                  |
|----|--------------------------|----|--------------------------------------------------------------------------------------------------------------------------------------------------------------------------------------------------------------|------------------|
| 1  | Main results             | 16 | (a) Give unadjusted estimates and, if applicable, confounder-adjusted estimates and their precision (eg, 95% confidence interval). Make clear which confounders were adjusted for and why they were included | 7;8;18;19        |
| 2  |                          |    | (b) Report category boundaries when continuous variables were categorized                                                                                                                                    | 15;17            |
| 3  |                          |    | (c) If relevant, consider translating estimates of relative risk into absolute risk for a meaningful time period                                                                                             | No relative risk |
| 4  | Other analyses           | 17 | Report other analyses done—eg analyses of subgroups and interactions, and sensitivity analyses                                                                                                               |                  |
| 5  | <b>Discussion</b>        |    |                                                                                                                                                                                                              |                  |
| 6  | Key results              | 18 | Summarise key results with reference to study objectives                                                                                                                                                     | 9                |
| 7  | Limitations              | 19 | Discuss limitations of the study, taking into account sources of potential bias or imprecision. Discuss both direction and magnitude of any potential bias                                                   | 13               |
| 8  | Interpretation           | 20 | Give a cautious overall interpretation of results considering objectives, limitations, multiplicity of analyses, results from similar studies, and other relevant evidence                                   | 10;11;12;13      |
| 9  | Generalisability         | 21 | Discuss the generalisability (external validity) of the study results                                                                                                                                        | 13               |
| 10 | <b>Other information</b> |    |                                                                                                                                                                                                              |                  |
| 11 | Funding                  | 22 | Give the source of funding and the role of the funders for the present study and, if applicable, for the original study on which the present article is based                                                | Figure 1         |

\*Give information separately for exposed and unexposed groups.

**Note:** An Explanation and Elaboration article discusses each checklist item and gives methodological background and published examples of transparent reporting. The STROBE checklist is best used in conjunction with this article (freely available on the Web sites of PLoS Medicine at <http://www.plosmedicine.org/>, Annals of Internal Medicine at <http://www.annals.org/>, and Epidemiology at <http://www.epidem.com/>). Information on the STROBE Initiative is available at <http://www.strobe-statement.org>.



# BMJ Open

## Association between psychosocial work-related factors at midlife and arterial stiffness at older age in a prospective cohort of 1,736 white-collar workers

|                                 |                                                                                                                                                                                                                                                                                                                                                                                                                                                                                                                                                                                                                                                                                                                                                                                                                                                                                                                                                                                                                                                                                                                                                                                                                                                               |
|---------------------------------|---------------------------------------------------------------------------------------------------------------------------------------------------------------------------------------------------------------------------------------------------------------------------------------------------------------------------------------------------------------------------------------------------------------------------------------------------------------------------------------------------------------------------------------------------------------------------------------------------------------------------------------------------------------------------------------------------------------------------------------------------------------------------------------------------------------------------------------------------------------------------------------------------------------------------------------------------------------------------------------------------------------------------------------------------------------------------------------------------------------------------------------------------------------------------------------------------------------------------------------------------------------|
| Journal:                        | <i>BMJ Open</i>                                                                                                                                                                                                                                                                                                                                                                                                                                                                                                                                                                                                                                                                                                                                                                                                                                                                                                                                                                                                                                                                                                                                                                                                                                               |
| Manuscript ID                   | bmjopen-2023-073649.R1                                                                                                                                                                                                                                                                                                                                                                                                                                                                                                                                                                                                                                                                                                                                                                                                                                                                                                                                                                                                                                                                                                                                                                                                                                        |
| Article Type:                   | Original research                                                                                                                                                                                                                                                                                                                                                                                                                                                                                                                                                                                                                                                                                                                                                                                                                                                                                                                                                                                                                                                                                                                                                                                                                                             |
| Date Submitted by the Author:   | 04-Aug-2023                                                                                                                                                                                                                                                                                                                                                                                                                                                                                                                                                                                                                                                                                                                                                                                                                                                                                                                                                                                                                                                                                                                                                                                                                                                   |
| Complete List of Authors:       | <p>Massamba, Victoria; Université Laval, Department of social and preventive medicine; Centre de recherche du CHU de Québec-Université Laval</p> <p>Talbot, Denis; Université Laval, Department of social and preventive medicine; Université Laval, Department of social and preventive medicine</p> <p>Milot, Alain; Centre de recherche du CHU de Québec-Université Laval; Université Laval</p> <p>Trudel, Xavier; Laval University,</p> <p>Dionne, Clermont E; Université Laval, Department of social and preventive medicine; Centre de recherche du CHU de Québec-Université Laval</p> <p>Vézina, Michel; Institut national de sante publique du Quebec</p> <p>Mâsse, Benoit; Université de Montréal</p> <p>Gilbert-Ouimet, Mahée; Centre de recherche du CHU de Québec-Université Laval; Université du Québec à Rimouski, Department of health sciences</p> <p>Dagenais, Gilles; Institut universitaire de cardiologie et de pneumologie de Quebec</p> <p>Pearce, Neil; London school of hygiene and tropical Medicine, Departments of medical statistics and non-communicable disease epidemiology</p> <p>Brisson, Chantal; Université Laval, Department of social and preventive medicine; Centre de recherche du CHU de Québec-Université Laval</p> |
| <b>Primary Subject Heading</b>: | Epidemiology                                                                                                                                                                                                                                                                                                                                                                                                                                                                                                                                                                                                                                                                                                                                                                                                                                                                                                                                                                                                                                                                                                                                                                                                                                                  |
| Secondary Subject Heading:      | Occupational and environmental medicine, Cardiovascular medicine                                                                                                                                                                                                                                                                                                                                                                                                                                                                                                                                                                                                                                                                                                                                                                                                                                                                                                                                                                                                                                                                                                                                                                                              |
| Keywords:                       | EPIDEMIOLOGY, Risk Factors, OCCUPATIONAL & INDUSTRIAL MEDICINE, Occupational Stress                                                                                                                                                                                                                                                                                                                                                                                                                                                                                                                                                                                                                                                                                                                                                                                                                                                                                                                                                                                                                                                                                                                                                                           |
|                                 |                                                                                                                                                                                                                                                                                                                                                                                                                                                                                                                                                                                                                                                                                                                                                                                                                                                                                                                                                                                                                                                                                                                                                                                                                                                               |

SCHOLARONE™  
Manuscripts

1  
2  
3  
4  
5  
6  
7  
8  
9  
10  
11  
12  
13  
14  
15  
16  
17  
18  
19  
20  
21  
22  
23  
24  
25  
26  
27  
28  
29  
30  
31  
32  
33  
34  
35  
36  
37  
38  
39  
40  
41  
42  
43  
44  
45  
46  
47  
48  
49  
50  
51  
52  
53  
54  
55  
56  
57  
58  
59  
60

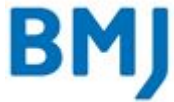

I, the Submitting Author has the right to grant and does grant on behalf of all authors of the Work (as defined in the below author licence), an exclusive licence and/or a non-exclusive licence for contributions from authors who are: i) UK Crown employees; ii) where BMJ has agreed a CC-BY licence shall apply, and/or iii) in accordance with the terms applicable for US Federal Government officers or employees acting as part of their official duties; on a worldwide, perpetual, irrevocable, royalty-free basis to BMJ Publishing Group Ltd ("BMJ") its licensees and where the relevant Journal is co-owned by BMJ to the co-owners of the Journal, to publish the Work in this journal and any other BMJ products and to exploit all rights, as set out in our [licence](#).

The Submitting Author accepts and understands that any supply made under these terms is made by BMJ to the Submitting Author unless you are acting as an employee on behalf of your employer or a postgraduate student of an affiliated institution which is paying any applicable article publishing charge ("APC") for Open Access articles. Where the Submitting Author wishes to make the Work available on an Open Access basis (and intends to pay the relevant APC), the terms of reuse of such Open Access shall be governed by a Creative Commons licence – details of these licences and which [Creative Commons](#) licence will apply to this Work are set out in our licence referred to above.

Other than as permitted in any relevant BMJ Author's Self Archiving Policies, I confirm this Work has not been accepted for publication elsewhere, is not being considered for publication elsewhere and does not duplicate material already published. I confirm all authors consent to publication of this Work and authorise the granting of this licence.

1  
2  
3  
4  
5 **Association between psychosocial work-related factors at midlife and arterial**  
6 **stiffness at older age in a prospective cohort of 1,736 white-collar workers**  
7  
8  
9  
10

11 Victoria Kubuta Massamba<sup>1,2</sup>, Denis Talbot<sup>1,2</sup>, Alain Milot<sup>2,3</sup>, Xavier Trudel\*<sup>1,2</sup>, Michel  
12 Vézina<sup>4</sup>, Clermont E. Dionne<sup>1,2</sup>, Benoît Mâsse<sup>5</sup>, Mahée Gilbert-Ouimet<sup>2,6</sup>, Gilles R.  
13 Dagenais<sup>3,7</sup>, Neil Pearce<sup>8</sup>, Chantal Brisson<sup>1,2</sup>  
14  
15  
16  
17

18 <sup>1</sup> Department of social and preventive medicine, Université Laval, Québec, QC, Canada.

19 <sup>2</sup> Centre de recherche du CHU de Québec-Université Laval, Québec, QC, Canada.

20 <sup>3</sup> Faculty of medicine, Université Laval, Québec, QC, Canada.

21 <sup>4</sup> Institut national de santé publique du Québec (INSPQ), Québec, QC, Canada.

22 <sup>5</sup> School of public health, Université de Montréal, Montréal, QC, Canada.

23 <sup>6</sup> Department of health sciences, Université du Québec à Rimouski, Lévis, QC, Canada.

24 <sup>7</sup> University institute of cardiology and pneumology of Québec (IUCPQ), Québec, QC, Canada

25 <sup>8</sup> Departments of medical statistics and non-communicable disease epidemiology, London school of hygiene  
26 and tropical Medicine, London, UK.  
27  
28  
29  
30  
31  
32

33 \*Corresponding author. Centre de recherche du CHU de Québec – Université Laval, Hôpital du Saint-Sacrement, 1050  
34 Chemin Ste-Foy, Québec (QUE) G1V 0A6, Canada. Tel: 418-682-7390; Fax: 418-682-7949;  
35 [xavier.trudel@crchudequebec.ulaval.ca](mailto:xavier.trudel@crchudequebec.ulaval.ca)  
36  
37  
38  
39  
40

41 Key words: Psychosocial work-related factors, arterial stiffness, blood pressure,  
42 prevention.  
43

44 Number of words: 3,090 (from the introduction to the conclusion, excluding title page,  
45 abstract, references, figures and tables)  
46  
47  
48  
49  
50  
51  
52  
53  
54  
55  
56  
57  
58  
59  
60

## Abstract

**Objective** Arterial stiffness and exposure to psychosocial work-related factors increase the risk of developing cardiovascular disease (CVD). However, little is known about the relationship between psychosocial work-related factors and arterial stiffness. We aimed to examine this relationship.

**Design** Prospective cohort study.

**Setting** Public organizations in Quebec City, Canada.

**Participants** The study included 1,736 white-collar workers (women 52%) from 19 public organizations.

**Primary and secondary outcome measures** Association between psychosocial work-related factors from the job strain and effort-reward imbalance (ERI) models assessed at study baseline (1999-2001) with validated instruments and arterial stiffness assessed using carotid-femoral pulse wave velocity at follow-up, on average 16 years later (2015-2018). Generalized estimating equations were used to estimate differences in arterial stiffness between exposed and unexposed participants. Subgroup analyses according to sex, age, blood pressure (BP), cardiovascular risk score and employment status were conducted.

**Results** Among participants with high diastolic BP ( $\geq 90$  mmHg) at baseline, aged 47 on average, those exposed to high job strain had higher arterial stiffness (+1.38 m/s (95% CI: +0.57; +2.19)) at follow-up, 16 years later, following adjustment for a large set of potential confounders. The trend was similar in participants with high systolic BP ( $\geq 140$  mmHg) exposed to high job strain (+0.84 m/s (95% CI: -0.35; +2.03)). No association was observed for ERI in the total sample and counterintuitive associations were observed in subgroup analyses.

**Conclusions** Job strain may have a long-term deleterious effect on arterial stiffness in people with high BP. Interventions at midlife to reduce job strain may mitigate arterial stiffness progression.

**Strengths and limitations of this study**

- This study has a long follow-up period of 16 years.
- Arterial stiffness was measured using carotid-femoral pulse wave velocity, the gold standard.
- Psychosocial work-related factors were assessed using validated instruments.
- This study examines the effect of psychosocial work-related factors measured at a single point in time.

For peer review only

## Introduction

Cardiovascular disease (CVD) is a major public health problem. CVD develops over several years across a continuum initiated by one or several risk factors, which can progress to atherosclerosis, cardiovascular events and end-stage organ disease (1). The main modifiable risk factors for CVD include dyslipidemia, high blood pressure (BP), smoking, diabetes and adiposity. Additional factors such as psychosocial work-related factors can contribute to increase the risk of CVD (2). In Organisation for Economic Co-operation and Development countries, 20-25% of workers are exposed to adverse psychosocial work-related factors (3).

Arterial stiffness describes the reduced ability of large proximal arteries to dilate and retract. Carotid-femoral pulse wave velocity (cfPWV), the gold standard method for assessing aortic stiffness, is linearly associated with CVD risk (4). An increase in aortic pulse wave velocity of 1 m/s corresponds to an adjusted risk increase of 14% in fatal or nonfatal cardiovascular events (4). Adverse psychosocial work-related factors may be associated with high arterial stiffness. Results of prior studies differ according to types of exposure and sex, suggesting deleterious (5-9), beneficial (10) or no effect (11) of psychosocial work-related factors on arterial stiffness. All prior studies are limited by their cross-sectional design. None used the gold standard measure for arterial stiffness.

The objective of the present study was to examine the association between psychosocial work-related factors and arterial stiffness in a prospective cohort study of men and women from Quebec City, Canada. Men and women were considered separately since the prevalence of psychosocial work-related factors and their effects differ by sex (2). Elevated midlife BP is associated with increased arterial stiffness (12). The relationship between midlife psychosocial work-related factors and arterial stiffness might therefore vary between people with and without elevated BP. This potential effect modification was examined.

## Methods

### *Population and study design*

We used data from a prospective cohort study. This cohort was initiated in 1991-1993 among 9,188 white-collar workers (participation proportion: 75%) from 19 public

1  
2  
3 organizations in Quebec City with two subsequent phases of data collection (1999-2001  
4 and 2015-2018) (13). The current study baseline was set in 1999-2001, since ERI exposure  
5 was firstly assessed at that time. Arterial stiffness was assessed at follow up (2015-2018).  
6  
7 Among the 9,188 participants in the original cohort initiation, 8,120 (88.4 %) and 6,707  
8 (73 %) participated at 1999-2001 and 2015-2018, respectively. Arterial stiffness was  
9 measured in 1/3 of participants randomly selected. For the present study, baseline  
10 corresponds to the 1999-2001 period and follow-up time to 2015-2018. The study sample  
11 included 1,736 participants with employee status at baseline (Figure 1). The *Centre*  
12 *Hospitalier Universitaire de Québec – Université Laval* (CHUdeQc-UL) ethical research  
13 committee (2012-1674; DR-002-1409; F9H-63202) approved the study. All participants  
14 signed an informed consent form.  
15  
16  
17  
18  
19  
20  
21  
22  
23

#### 24 *Data collection*

25 At each wave, workers completed a self-administered questionnaire on risk factors  
26 for hypertension and CVD, demographic, occupational and social characteristics. Trained  
27 staff measured BP (using the mercury sphygmomanometer at baseline and the automated  
28 BP-TRU device (VSM MedTech, Coquitlam, Canada) at follow-up), height, weight, and  
29 waist circumference. Arterial stiffness was measured at follow-up.  
30  
31  
32  
33  
34  
35

#### 36 *Psychosocial work-related factors*

37 Job strain and effort-reward imbalance (ERI) exposures were assessed at baseline  
38 (1999-2001). Components of job strain (psychological demands and job control) were  
39 measured using 18 items from the Job Content Questionnaire (14). Psychological demands  
40 include the quantity of work, time constraints and level of intellectual effort. Job control  
41 includes opportunities for learning, autonomy, and participation in the decision-making  
42 process. The theoretical model postulates that the greatest health risk occurs in workers  
43 combining high demands and low control. The psychometric properties of the original  
44 English (15) and French (16) questionnaires have been demonstrated. We classified  
45 workers with demands scores  $\geq 24$  (the median in the Quebec working population) in the  
46 *high demands* group and those with control scores  $\leq 72$  (the median in the Quebec working  
47 population) in the *low control* group. The *low strain* group included workers combining  
48  
49  
50  
51  
52  
53  
54  
55  
56  
57  
58  
59  
60



1  
2  
3 *low demands* and *high control*. The *passive*, *active* and *high strain* groups included  
4 respectively people combining *low demands* and *low control*, *high demands* and *high*  
5 *control* and *high demands* and *low control*.  
6  
7

8 The ERI model states that efforts should be rewarded with income, respect and  
9 esteem, and occupational status control. Workers are in a state of deleterious imbalance  
10 when high efforts are accompanied by low reward, and are more susceptible to health  
11 problems. The modified French version of the questionnaire was used to assess ERI.  
12 Reward at work was measured by nine original questions from the French version (17) of  
13 the ERI scale. Effort was measured by nine items from the validated French version of the  
14 psychological demand scale of the Job Content Questionnaire (18). The psychometric  
15 qualities of this ERI scale version have been demonstrated (19). Effort and reward scores  
16 were computed with the sum of items. A ratio efforts/reward > 1 indicated an imbalance.  
17 The ratio was also used in its continuous form.  
18  
19  
20  
21  
22  
23  
24  
25  
26

#### 27 *Arterial stiffness as cfPWV (m/s)*

28  
29 Arterial stiffness was measured at follow-up using the Complior Analyse device  
30 (Alam Medical, Saint-Quentin-Fallavier, France). The transit time between the carotid and  
31 the femoral pulse was measured twice in each participant. cfPWV was calculated by  
32 dividing the carotid-femoral transit distance (calculated using the difference in body  
33 surface measurements from the suprasternal notch to the femoral and carotid sites) by the  
34 carotid-femoral transit time delay. A third measurement was taken if the difference  
35 between the two measurements was > 0.5 m/s. Inter- and intra-observer reproducibility of  
36 this measurement has been reported as excellent (20).  
37  
38  
39  
40  
41  
42  
43

#### 44 *Covariates*

45  
46 Potential confounders included the following risk factors for arterial stiffness:  
47 demographic characteristics (age, sex, education, household income, marital status and  
48 having children); biological factors (BP, body mass index (BMI), waist circumference,  
49 diabetes, hypercholesterolemia and personal history of cardiovascular event), lifestyle  
50 factors (daily smoking, alcohol abuse and leisure time physical activity); family history of  
51  
52  
53  
54  
55  
56  
57  
58  
59  
60

1  
2  
3 CVD at  $\leq 60$  years of age; psychological distress (Psychiatric Symptom Index); other work  
4 factors (hours worked for the organization, hours worked for another organization).  
5  
6  
7

### 8 *Statistical analyses*

9

10 Continuous data were expressed as the mean along with the standard deviation.  
11 Categorical data were expressed as number and percentages. Generalized estimating  
12 equations were used to estimate differences in arterial stiffness means between the exposed  
13 and unexposed groups, with their 95% confidence interval (21). Regression models  
14 accounted for the correlation between employees of the same organization. The models  
15 were sequentially adjusted for sets of covariates given that biological factors, psychological  
16 distress and lifestyle factors potentially mediate the associations (Figure 2). As job strain  
17 and ERI models provide distinct information, we assessed the independent effect of job  
18 strain and ERI by adjusting for job strain when measuring the association with ERI and  
19 vice versa. In order to assess effect modification, we conducted subgroup analyzes by sex  
20 and BP (systolic, diastolic and pulse pressure) at baseline. Sensitivity analyses were also  
21 conducted i) with and without individuals with personal history of CVD since they may  
22 have increased arterial stiffness; ii) according to risk factors for arterial stiffness at baseline  
23 (age and Gaziano's cardiovascular risk score (22)) since they may increase the deleterious  
24 effects of psychosocial work-related factors (23); iii) according to job status at follow-up  
25 since retirement may attenuate the effects of psychosocial work-related factors (24).  
26 Multiple imputations (25) and inverse probability weighting (26) were performed to  
27 minimize potential selection bias due to non-response and/or loss to follow-up. Covariates  
28 measured at the initiation of the original cohort (in 1991-1993) were used in the calculation  
29 of the weights that were used for inverse probability weighting in order to minimize the  
30 potential selection bias resulting from losses to follow-up between cohort initiation and  
31 subsequent time points.  
32  
33  
34  
35  
36  
37  
38  
39  
40  
41  
42  
43  
44  
45  
46  
47

48 Analyses were performed with SAS 9.4 software. The level of statistical significance was  
49 set at 0.05.  
50  
51  
52  
53  
54  
55  
56  
57  
58  
59  
60

### *Participant and public involvement*

Participants or the public were not involved in the study design, conduct, reporting, or dissemination plans.

## **Results**

Mean follow-up time between exposure (baseline) and arterial stiffness assessment (follow-up) was 16.8 (standard deviation: 1.3) years. At baseline, participants were on average 45 years old. More women (23%) than men (17%) were exposed to high job strain. As many men as women were exposed to ERI (24%). At follow-up, participants were on average 62 years old (Table 1).

Table 2 presents mean arterial stiffness at follow-up in men and women according to main risk factors for cardiovascular diseases and psychosocial work-related factor at baseline. Arterial stiffness (mean:  $8.1 \pm 1.7$  m/s) was higher in men, in older participants and among those with high BP, diabetes, hypercholesterolemia, high waist circumference, high BMI and moderate or high cardiovascular risk score.

Table 3 presents the association between psychosocial work-related factors at baseline and arterial stiffness at follow-up. In men, arterial stiffness was slightly higher in those with passive jobs. In women, arterial stiffness was higher in participants exposed to ERI. All differences were modest and not statistically significant, with confidence intervals including the null value.

Table 4 presents the association between psychosocial work-related factors and arterial stiffness according to BP at baseline. The high job strain group had higher arterial stiffness (+1.38 m/s (95%CI: +0.57; +2.19)) among participants with high diastolic BP ( $\geq 90$  mmHg) and lower arterial stiffness (-0.25 (95%CI: -0.48;-0.02)) among those with lower diastolic BP (<90 mmHg). The same trend was observed for systolic BP. The high job strain group had higher arterial stiffness (+0.84 m/s (95% CI: -0.35; +2.03),  $p=0.17$ ) among those with systolic BP  $\geq 140$  mmHg. Arterial stiffness was also higher in the high job strain (+3.00 (95%CI: +1.18;+4.76)) and the passive (+2.06 (95%CI: +0.69;+3.44)) groups among participants with pulse pressure  $> 60$  mmHg. However, only 43 participants had high pulse pressure. ERI was associated with lower arterial stiffness in participants with systolic BP  $\geq 140$  mmHg (-1.17 (95%CI:-2.12;-0.22)), in those with diastolic BP  $\geq 90$

1  
2  
3 mmHg (-0.48 (95%CI:-1.10;+0.14)) and with pulse pressure>60 mmHg (-2.06 (95%CI:-  
4 3.33;-0.79)) (Table 4).

5  
6 Supplementary analyses showed that arterial stiffness tended to be higher in  
7 participants exposed to job strain who were  $\geq 55$  years old or had a moderate or high CVD  
8 risk score. The ERI group had higher arterial stiffness in the 55+ age stratum (+0.52  
9 (95%CI:-0.67;+1.71) (Table S1, supplement). Psychosocial work-related factors were not  
10 associated with arterial stiffness when stratifying according to employment status and  
11 duration of retirement (Table S2a and S2b, supplement). The findings were similar with  
12 and without participants with history of CVD (Table S3, supplement), and before and after  
13 multiple imputation and inverse probability weighting (Table S4, supplement).

## 20 Discussion

21  
22 In the present study, arterial stiffness was not significantly higher in men and  
23 women exposed to high job strain and ERI overall. However, among participants with  
24 higher diastolic BP at midlife, high job strain was associated with higher arterial stiffness  
25 16 years later. This association was robust to adjustment for socio-demographics, lifestyle-  
26 related risk factors, CVD risk factors and other factors from the work environment.

27  
28 Prior studies assessing the relationship between psychosocial work-related factors  
29 and arterial stiffness were cross-sectional (5-11). Most suggest a deleterious effect (5-9).  
30 Studies suggesting a protective (10) or no effect (11) involved relatively young participants  
31 ( $\leq 40$  years). Studies showing deleterious associations included people aged over 40 years  
32 on average (5-7, 9), a high proportion of smokers (>40%) (5, 6) or targeted workers in  
33 professions at higher risk of developing CVD such as firefighters (9). Given their cross-  
34 sectional design, previous studies do not inform on different aspects of the temporal  
35 relationship between psychosocial work-related factors and arterial stiffness, including the  
36 optimal time window and follow-up period. The time required between exposure to  
37 psychosocial work-related factors and arterial stiffness may vary according to the position  
38 of individuals on the cardiovascular continuum. A longer follow-up time could be required  
39 for participants who are at an earlier stage than for those who are at a more advanced stage  
40 of progression. In the present study, high job strain was associated with increased arterial  
41 stiffness 16 years later (+1.38 m/s), in participants with high diastolic BP at time of  
42 exposure assessment (baseline). The mean age of participants with high DBP at baseline  
43  
44  
45  
46  
47  
48  
49  
50  
51  
52  
53  
54  
55  
56  
57  
58  
59  
60

1  
2  
3 was 47 years old. Given that diastolic hypertension predominates in relatively young  
4 individuals, at a relatively early stage of the cardiovascular continuum and that CVD  
5 develops over at least a decade, it is reasonable to postulate that the follow-up period used  
6 in the present study was appropriate for measuring the association between midlife work-  
7 related factors and arterial stiffness in participants with high DBP at midlife (12, 27).  
8  
9

10  
11  
12 Increased arterial stiffness was also observed among participants with high systolic  
13 BP. This association was however of smaller magnitude and did not reach statistical  
14 significance. This is consistent with the natural history of systolic/diastolic BP progression  
15 and its link with CVD diseases onset (27). On the contrary, high job strain was associated  
16 with reduced arterial stiffness in participants who did not have high BP. Measuring the  
17 association between midlife stressors and arterial stiffness among people who do not have  
18 high BP may require a longer follow-up, which could explain the presence of this  
19 counterintuitive protective association. This is consistent with a previous cross-sectional  
20 study which showed a protective association between job strain index and brachial-ankle  
21 PWV (-1.38 m/s,  $p < 0.01$ ). This previous study included young participants (median age:  
22 31 years) with diastolic (median: 79 mmHg) and systolic (median: 110 mmHg) BP in the  
23 normal range (10). Further studies are needed to confirm these results.  
24  
25  
26  
27  
28  
29  
30  
31

32  
33 Due to limited statistical power, caution should be exercised in interpreting the  
34 trends of increased arterial stiffness among participants exposed to job strain in moderate  
35 to high cardiovascular risk score and older participants' strata. These results should be  
36 regarded as hypothesis generating. In our study, the participants who remained actively  
37 employed at follow-up were relatively young (on average 39 years old) and had a low  
38 cardiovascular risk score (98%) at baseline. Younger age combined with low  
39 cardiovascular risk score may contribute to the absence of observed association. Indeed,  
40 among this younger subgroup, the timeframe for arterial stiffness assessment could have  
41 been suboptimal. ERI was associated with lower arterial stiffness in participants with high  
42 systolic BP, diastolic BP and high pulse pressure. This is counterintuitive and needs to be  
43 replicated.  
44  
45  
46  
47  
48  
49  
50

51  
52 In normotensive people without additional cardiovascular risk factors aged 60 to  
53 69, the reference value for arterial stiffness is on average 10.3 m/s (28, 29). In the present  
54 study, the average value (8.3 m/s) of participants in this age group ( $n=930$ ) is lower. The  
55  
56  
57  
58  
59  
60

1  
2  
3 attrition due to non-response and loss to follow-up may have contributed to these finding  
4 given the loss of individuals who may be sicker than those who participated, as  
5 demonstrated in this cohort (30). As expected, participants at higher risk of CVD (men,  
6 older age, high BP, diabetes, hypercholesterolemia, high waist circumference, high BMI,  
7 moderate or high cardiovascular risk score) generally had higher arterial stiffness than  
8 those at lower risk. The observed association between psychosocial work-related factors  
9 and cfPWV can be translated into vascular age. For example, among participants with  
10 elevated DBP, those exposed to job strain (mean age: 63.1) had a mean cfPWV of 9.4 m/s,  
11 which is compatible with a vascular age of 50-59 years (28, 29). However, participants  
12 with elevated DBP in the low strain category (mean age: 64.9) had a mean cfPWV = 7.9  
13 m/s, which is compatible with a vascular age of 30-39 years (28, 29). The observed  
14 difference in cfPWV among participants exposed to job strain within this subgroup is  
15 therefore compatible with a decade discrepancy in vascular age.  
16  
17  
18  
19  
20  
21  
22  
23  
24  
25

26 Chronic stress accelerates aging of arteries by incompletely understood  
27 mechanisms. Chronic stress can on one hand activate the sympathetic nervous system  
28 interconnected with the renin-angiotensin-aldosterone system and endothelin-1 activity  
29 and on the other hand promote risky lifestyle (31, 32). This leads to changes in vascular  
30 cell phenotypes and to thickening of the arterial innermost and intermediate layers, stiffness  
31 and increase in systolic and pulse pressure later on (31). Increased arterial stiffness causes  
32 excessive transmission of pulse pressure that can damage the microcirculation of target  
33 organs, which increases the risk of cardiovascular events (33). Older subjects or those with  
34 cardiovascular risk factors could have decreased endothelial regeneration capacity due to  
35 a reduced number of circulating progenitor endothelial cells (31, 34). A reduced  
36 regenerative capacity could explain a deleterious effect of job strain in people with an  
37 increased risk of developing a cardiovascular event given their age, cardiovascular risk  
38 score or high BP. Al Mheid et al. observed significant interactions ( $P \leq 0.005$ ) between age  
39 and the burden of cardiovascular risk factors (smoking, diabetes mellitus, hypertension, or  
40 hyperlipidemia), such that for younger subjects (<40 years), cardiovascular risk factors  
41 were associated with increased progenitor cells counts, whereas for older subjects (>60  
42 years), cardiovascular risk factors and CVD were associated with lower progenitor cells  
43 counts (34).  
44  
45  
46  
47  
48  
49  
50  
51  
52  
53  
54  
55  
56  
57  
58  
59  
60

1  
2  
3 Our study has several strengths. To our knowledge, this is the first study to examine  
4 the association between psychosocial work-related factors assessed at midlife and arterial  
5 stiffness assessed at older age, using a prospective cohort. The 16-year follow-up allowed  
6 exploration of long-term effects. Other strengths are the use of a gold standard arterial  
7 stiffness measurement and validated psychosocial work-related factors models, sequential  
8 adjustment by several potentially confounding factors, inverse probability weighting to  
9 minimize the potential for selection bias and subgroup analyzes based on a priori evidence.

10  
11 Our study has also limitations. First, the potential for selection bias due to a high  
12 proportion of missing values (40% out of 2,621 participants) and losses to follow-up (19%  
13 out of 2,621) may underestimate associations (30). However, the associations were similar  
14 before and after accounting for potential selection bias using multiple imputations and  
15 inverse probability weighting, suggesting that this potential bias could not have explained  
16 our results. Second, the use of a single measure of exposure limits the capacity to capture  
17 fluctuations in exposure and can lead to non-differential misclassification of exposure that  
18 may underestimate the association. Third, measuring arterial stiffness in 1/3 of participants  
19 combined with attrition reduced statistical power. Fourth, the study population was entirely  
20 composed of white-collar workers. Caution is therefore advised in generalizing to other  
21 types of occupations. The fact that our sample is composed exclusively of white-collar  
22 employees limits potential confounding by occupational physical burden (repetitive  
23 movements, lifting heavy loads, long walking distance ...). Fifth, arterial stiffness was  
24 measured at a single time point (at follow-up only). Therefore, stiffness progression over  
25 time could not be assessed limiting the possibility to draw causal inferences. However, data  
26 on several other major cardiovascular risk factors (age, blood pressure, cholesterol,  
27 smoking, etc.) were controlled for, which minimized the possibility for participants in  
28 compared group to substantially differ regarding their overall cardiovascular profile at  
29 baseline.  
30  
31  
32  
33  
34  
35  
36  
37  
38  
39  
40  
41  
42  
43  
44  
45  
46  
47  
48  
49  
50  
51  
52  
53  
54  
55  
56  
57  
58  
59  
60

## Conclusion

Job strain exposure combined with high BP at midlife may have long-term deleterious effects on arterial stiffness. Interventions at midlife to reduce job strain may be considered as a potential way to manage CVD risk.

## Data availability statement

Data cannot be shared publicly due to privacy concerns of study participants. However, data will be shared following a justified request to the corresponding author, conditional on permission from the *Centre Hospitalier Universitaire de Québec – Université Laval* (CHUdeQc-UL) ethical research committee.

## Ethics statements

Patient consent for publication

Not applicable

Ethics approval

The study was approved by the *Centre Hospitalier Universitaire de Québec – Université Laval* (CHUdeQc-UL) ethical research committee (2012-1674; DR-002-1409; F9H-63202).

## Acknowledgments

We thank all the participants of the study.

## Contributors

VKM conceptualized and designed the study, performed the statistical analysis, drafted, reviewed and edited the manuscript. CB was responsible for the study concept, supervised the data collection and the methodological aspects, reviewed and edited the manuscript. DT supervised the analytical approach, revised the statistical analysis program, reviewed and edited the manuscript. AM supervised aspects related to arterial stiffness, blood pressure and other cardiovascular risk factors, reviewed and edited the manuscript. XT supervised the methodological aspects, reviewed and edited the manuscript. MV, CED, BM, MGO, GRD and NP reviewed and edited the manuscript.



### **Funding**

This work was supported by the Canadian Institutes of Health Research (grant number MA-11364). VKM was the recipient of a research award from the FRQS and the CERSSPL-UL. DT was supported by a Junior-2 career award from the FRQS.

### **Competing interests**

Funders had no influence on study conduct and reporting. The authors have reported that they have no relationships relevant to the contents of this paper to disclose.

### **Participant and public involvement**

Participants or the public were not involved in the study design, conduct, reporting, or dissemination plans.

**Table 1.** Population characteristics at baseline (1999-2001) (unless otherwise stated) by sex

|                                                 | Missing | All 1736<br>(100.0%) | Missing | Men 839<br>(48.3%) | Missing | Women 897<br>(51.7%) |
|-------------------------------------------------|---------|----------------------|---------|--------------------|---------|----------------------|
| Age y, mean (SD), cohort initiation (1991-1993) | 0       | 37.3 (6.6)           | 0       | 38.6 (6.9)         |         | 36.2 (6.1)           |
| Age y, mean (SD), baseline (1999-2001)          | 0       | 44.9 (6.7)           | 0       | 46.2 (7.0)         | 0       | 43.8 (6.2)           |
| Age y, mean (SD), follow-up (2015-2018)         | 0       | 61.7 (6.1)           | 0       | 63.0 (6.4)         |         | 60.6 (5.6)           |
| Job strain                                      | 16      |                      | 7       |                    | 9       |                      |
| Low strain                                      |         | 298 (17.3)           |         | 174 (20.9)         |         | 124 (14.0)           |
| Passive                                         |         | 592 (34.4)           |         | 237 (28.5)         |         | 355 (40.0)           |
| Active                                          |         | 486 (28.3)           |         | 280 (33.7)         |         | 206 (23.2)           |
| High strain                                     |         | 344 (20.0)           |         | 141 (17.0)         |         | 203 (22.9)           |
| Effort-reward imbalance                         | 47      |                      | 24      |                    | 23      |                      |
| Yes                                             |         | 408 (24.2)           |         | 197 (24.2)         |         | 211 (24.1)           |
| No                                              |         | 1281<br>(75.8)       |         | 618 (75.8)         |         | 663 (75.9)           |
| Completed education                             | 12      |                      | 3       |                    | 9       |                      |
| Secondary or less<br>College (CEGEP)            |         | 334 (19.4)           |         | 67 (8.0)           |         | 267 (30.1)           |
| University                                      |         | 530 (30.7)           |         | 238 (28.5)         |         | 292 (32.9)           |
| University                                      |         | 860 (49.9)           |         | 531 (63.5)         |         | 329 (37.1)           |
| Household income \$C <sup>a</sup>               | 11      |                      | 4       |                    | 7       |                      |
| 0 - 49 999                                      |         | 426 (24.7)           |         | 144 (17.3)         |         | 282 (31.7)           |
| 50 000 - 79 999                                 |         | 681 (39.5)           |         | 362 (43.4)         |         | 319 (35.8)           |
| ≥ 80 000\$                                      |         | 618 (35.8)           |         | 329 (39.4)         |         | 289 (32.5)           |
| Marital status                                  | 4       |                      | 2       |                    | 2       |                      |
| Partnered                                       |         | 1328<br>(76.7)       |         | 695 (83.0)         |         | 633 (70.7)           |
| Unpartnered                                     |         | 404 (23.3)           |         | 142 (17.0)         |         | 262 (29.3)           |
| Having children                                 |         |                      | 2       |                    | 1       |                      |
| One or more                                     |         |                      |         | 652 (77.9)         |         | 625 (69.8)           |
| No                                              |         |                      |         | 185 (22.1)         |         | 271 (30.3)           |
| Diabetes <sup>b</sup>                           | 0       |                      | 0       |                    | 0       |                      |
| Yes                                             |         | 34 (2.0)             |         | 16 (1.9)           |         | 18 (2.0)             |
| No                                              |         | 1702<br>(98.0)       |         | 823 (98.1)         |         | 879 (98.0)           |
| Hypercholesterolemia <sup>c</sup>               | 1       |                      | 1       |                    | 0       |                      |
| Yes                                             |         | 493 (28.4)           |         | 320 (38.2)         |         | 173 (19.3)           |
| No                                              |         | 1242<br>(71.6)       |         | 518 (61.8)         |         | 724 (80.7)           |
| Systolic blood pressure mmHg, mean (SD)         | 48      | 118.2<br>(13.7)      | 16      | 123.4<br>(12.9)    | 32      | 113.2 (12.6)         |
| Systolic blood pressure ≥140 mmHg               | 48      |                      | 16      |                    | 32      |                      |
| Yes                                             |         | 111 (6.6)            |         | 89 (10.8)          |         | 22 (2.5)             |
| No                                              |         | 1577<br>(93.4)       |         | 734 (89.2)         |         | 843 (97.5)           |
| Diastolic blood pressure mmHg, mean (SD)        | 48      | 76.7 (9.5)           | 16      | 80.1 (9.0)         | 32      | 73.4 (8.8)           |
| Diastolic blood pressure ≥90 mmHg               | 48      |                      | 16      |                    | 32      |                      |
| Yes                                             |         | 169 (10.0)           |         | 122 (14.8)         |         | 47 (5.4)             |
| No                                              |         | 1519<br>(90.0)       |         | 701 (85.2)         |         | 818 (94.6)           |
| Hypertension status <sup>d</sup>                | 22      |                      | 13      |                    | 9       |                      |
| Yes                                             |         | 298 (17.4)           |         | 206 (24.9)         |         | 92 (10.4)            |
| No                                              |         | 1416<br>(82.6)       |         | 620 (75.1)         |         | 796 (89.6)           |
| Pulse pressure mmHg, mean (SD)                  | 48      | 41.5 (8.7)           | 16      | 43.3 (9.2)         | 32      | 39.8 (7.8)           |
| Pulse pressure ≥60 mmHg                         | 48      |                      | 16      |                    | 32      |                      |
| Yes                                             |         | 46 (2.7)             |         | 34 (4.1)           |         | 12 (1.4)             |
| No                                              |         | 1642<br>(97.3)       |         | 789 (95.9)         |         | 853 (98.6)           |
| Waist circumference cm, mean (SD)               | 50      | 84.4 (12.3)          | 17      | 92.2 (9.5)         | 33      | 76.9 (9.6)           |
| High waist circumference <sup>e</sup>           | 50      |                      | 17      |                    | 33      |                      |
| Yes                                             |         | 229 (13.6)           |         | 124 (15.1)         |         | 105 (12.2)           |
| No                                              |         | 1457<br>(86.4)       |         | 698 (84.9)         |         | 759 (87.9)           |
| Body Mass Index kg/m <sup>2</sup> , mean (SD)   | 18      | 25.3 (3.9)           | 8       | 26.2 (3.4)         | 10      | 24.4 (4.2)           |

|                                                         |    |             |    |            |             |
|---------------------------------------------------------|----|-------------|----|------------|-------------|
| Body Mass Index $\geq 25$ kg/m <sup>2</sup>             | 18 |             | 8  | 10         |             |
| Yes                                                     |    | 843 (49.1)  |    | 520 (62.6) | 323 (36.4)  |
| No                                                      |    | 875 (50.9)  |    | 311 (37.4) | 564 (63.6)  |
| Alcohol abuse <sup>f</sup>                              | 4  |             | 1  | 3          |             |
| Yes                                                     |    | 106 (6.1)   |    | 61 (7.3)   | 45 (5.0)    |
| No                                                      |    | 1626 (93.9) |    | 777 (92.7) | 849 (95.0)  |
| Daily smoking                                           | 4  |             | 1  | 3          |             |
| Yes                                                     |    | 200 (11.6)  |    | 91 (10.9)  | 109 (12.2)  |
| No                                                      |    | 1532 (88.5) |    | 747 (89.1) | 785 (87.8)  |
| Physical activity <sup>g</sup>                          | 4  |             | 1  | 3          |             |
| Yes                                                     |    | 898 (51.9)  |    | 465 (55.5) | 433 (48.4)  |
| No                                                      |    | 834 (48.2)  |    | 373 (44.5) | 461 (51.6)  |
| Psychological distress score, mean (STD)                |    |             | 6  | 7          | 19.0 (12.5) |
| High psychological distress score <sup>h</sup>          | 13 |             | 6  | 7          |             |
| Yes                                                     |    | 381 (22.1)  |    | 143 (17.2) | 238 (26.7)  |
| No                                                      |    | 1342 (77.9) |    | 690 (82.8) | 652 (73.3)  |
| Hours worked per week for the organization              | 24 |             | 13 | 11         |             |
| $\leq 40$                                               |    | 1601 (93.5) |    | 748 (90.6) | 853 (96.3)  |
| $> 40$                                                  |    | 111 (6.5)   |    | 78 (9.4)   | 33 (3.7)    |
| Hours worked per week for another organization          | 30 |             | 10 | 20         |             |
| 0                                                       |    | 1477 (86.6) |    | 698 (84.2) | 779 (88.8)  |
| $\geq 1$                                                |    | 229 (13.4)  |    | 131 (15.8) | 98 (11.2)   |
| Employee status, follow-up (2015-2018)                  | 2  |             | 1  | 1          |             |
| Yes                                                     |    | 507 (29.2)  |    | 230 (27.5) | 277 (30.9)  |
| No                                                      |    | 1222 (70.5) |    | 606 (72.3) | 616 (68.8)  |
| Imprecise                                               |    | 5 (0.3)     |    | 2 (0.24)   | 3 (0.33)    |
| Personal history of cardiovascular disease <sup>i</sup> | 8  |             | 1  | 7          |             |
| Yes                                                     |    | 101 (5.8)   |    | 54 (6.4)   | 47 (5.3)    |
| No                                                      |    | 1627 (94.2) |    | 784 (93.6) | 843 (94.7)  |
| Family history of cardiovascular disease <sup>j</sup>   | 34 |             | 15 | 19         |             |
| Yes                                                     |    | 784 (46.1)  |    | 356 (43.2) | 428 (48.8)  |
| No                                                      |    | 897 (52.7)  |    | 460 (55.8) | 437 (49.8)  |
| Don't know                                              |    | 21 (1.23)   |    | 8 (1.0)    | 13 (1.5)    |
| Gaziano's predicted cardiovascular risk score           | 53 |             | 18 | 35         |             |
| Low                                                     |    |             |    | 639 (77.8) | 814 (94.4)  |
| Moderate or High                                        |    |             |    | 182 (22.2) | 48 (5.6)    |

<sup>a</sup> Canadian dollars

<sup>b</sup> Diabetes was measured by the item "has a doctor ever told you that you have diabetes?"

<sup>c</sup> Hypercholesterolemia was measured by the item "has a doctor, nurse or other health care professional ever told you that your cholesterol level is too high?"

<sup>d</sup> Hypertension status refer to participants who had high BP or those who reported taking medication to lower their blood pressure.

<sup>e</sup> High waist circumference  $\geq 88$  cm (in women) or  $\geq 102$  cm (in men)

<sup>f</sup> 10 or more drinks a week in women or 15 or more drinks a week in men

<sup>g</sup> Performed leisure physical activity for 20 to 30 minutes per session at least twice a week

<sup>h</sup> Psychological distress score greater than or equal to the highest quintile (score  $> 26.19$ )

<sup>i</sup> Personal history of angina pectoris, unstable angina, acute myocardial infarction, coronary bypass surgery, percutaneous coronary intervention, stroke

<sup>j</sup> A member of the immediate family (father, mother, brother, or sister) has had a cardiac medical problem (angina, myocardial infarction, coronary bypass) or a stroke (paralysis, embolism, hemorrhage, thrombosis) under the age of 60 years.

**Table 2.** Arterial stiffness at follow-up (2015-2018) in men and women according to main cardiovascular diseases risk factors and psychosocial work-related factor at baseline (1999-2001)

|                                                       | All 1736       |           | Men 839        |            | Women 897      |           |
|-------------------------------------------------------|----------------|-----------|----------------|------------|----------------|-----------|
|                                                       | N <sup>a</sup> | Mean (SD) | N <sup>a</sup> | Mean (SD)  | N <sup>a</sup> | Mean (SD) |
| Age y                                                 |                |           |                |            |                |           |
| <55                                                   | 1602           | 8.0 (1.5) | 750            | 8.4 (1.7)  | 852            | 7.7 (1.3) |
| ≥55                                                   | 134            | 9.7 (2.3) | 89             | 10.0 (2.6) | 45             | 9.1 (1.5) |
| Systolic blood pressure, mmHg                         |                |           |                |            |                |           |
| <140                                                  | 1625           | 8.1 (1.6) | 750            | 8.5 (1.8)  | 875            | 7.7 (1.4) |
| ≥140                                                  | 111            | 9.2 (1.9) | 89             | 9.4 (1.9)  | 22             | 8.7 (1.7) |
| Diastolic blood pressure mmHg                         |                |           |                |            |                |           |
| <90                                                   | 1567           | 8.1 (1.7) | 717            | 8.5 (1.9)  | 850            | 7.7 (1.4) |
| ≥90                                                   | 169            | 8.9 (1.7) | 122            | 9.1 (1.7)  | 47             | 8.4 (1.5) |
| Hypertension status <sup>b</sup>                      |                |           |                |            |                |           |
| Yes                                                   | 298            | 8.9 (1.9) | 206            | 9.2 (2.0)  | 92             | 8.4 (1.6) |
| No                                                    | 1416           | 8.0 (1.6) | 620            | 8.4 (1.8)  | 796            | 7.7 (1.3) |
| High Pulse pressure <sup>c</sup> , (> 60 mmHg)        |                |           |                |            |                |           |
| Yes                                                   | 46             | 9.4 (2.3) | 34             | 9.43 (2.4) | 12             | 9.2 (2.0) |
| No                                                    | 1642           | 8.1 (1.7) | 789            | 8.5 (1.8)  | 853            | 7.7 (1.4) |
| Diabetes <sup>d</sup>                                 |                |           |                |            |                |           |
| Yes                                                   | 34             | 9.7 (3.0) | 16             | 11.3 (3.5) | 18             | 8.3 (1.6) |
| No                                                    | 1702           | 8.1 (1.6) | 823            | 8.5 (1.8)  | 879            | 7.7 (1.4) |
| Hypercholesterolemia <sup>e</sup>                     |                |           |                |            |                |           |
| Yes                                                   | 493            | 8.5 (1.8) | 320            | 8.8 (1.9)  | 173            | 7.9 (1.4) |
| No                                                    | 1242           | 8.0 (1.6) | 518            | 8.4 (1.8)  | 724            | 7.7 (1.4) |
| High waist circumference <sup>f</sup>                 |                |           |                |            |                |           |
| Yes                                                   | 229            | 8.6 (1.8) | 124            | 9.0 (2.1)  | 105            | 8.0 (1.3) |
| No                                                    | 1457           | 8.1 (1.7) | 715            | 8.5 (1.8)  | 792            | 7.7 (1.4) |
| Body Mass Index kg/m <sup>2</sup> , mean (SD)         |                |           |                |            |                |           |
| <25                                                   | 893            | 7.9 (1.5) | 319            | 8.4 (1.7)  | 574            | 7.7 (1.4) |
| ≥25                                                   | 843            | 8.4 (1.8) | 520            | 8.7 (1.9)  | 323            | 7.9 (1.4) |
| Daily smoking                                         |                |           |                |            |                |           |
| Yes                                                   | 200            | 8.3 (1.7) | 91             | 8.7 (1.9)  | 109            | 7.9 (1.4) |
| No                                                    | 1532           | 8.1 (1.7) | 747            | 8.5 (1.8)  | 785            | 7.7 (1.4) |
| Physical activity <sup>g</sup>                        |                |           |                |            |                |           |
| Yes                                                   | 898            | 8.1 (1.7) | 465            | 8.5 (1.8)  | 433            | 7.6 (1.4) |
| No                                                    | 834            | 8.2 (1.7) | 373            | 8.7 (1.9)  | 461            | 7.8 (1.4) |
| Gaziano's predicted cardiovascular risk score         |                |           |                |            |                |           |
| Low                                                   | 1453           | 7.9 (1.5) | 639            | 8.3 (1.6)  | 814            | 7.7 (1.3) |
| Moderate or High                                      | 230            | 9.5 (2.1) | 182            | 9.6 (2.2)  | 48             | 9.1 (1.6) |
| Number of accumulated cardiovascular risk factors     |                |           |                |            |                |           |
| 0-1                                                   | 1489           | 8.0 (1.6) | 690            | 8.4 (1.7)  | 799            | 7.7 (1.4) |
| 2+                                                    | 194            | 9.1 (2.1) | 131            | 9.4 (2.3)  | 63             | 8.4 (1.6) |
| Family history of cardiovascular disease <sup>h</sup> |                |           |                |            |                |           |
| Yes                                                   | 784            | 8.2 (1.7) | 356            | 8.6 (1.9)  | 428            | 7.8 (1.4) |
| No                                                    | 897            | 8.1 (1.6) | 460            | 8.5 (1.8)  | 437            | 7.6 (1.3) |
| Don't know                                            | 21             | 7.7 (1.8) | 8              | 8.4 (2.5)  | 13             | 7.3 (1.2) |
| Job strain                                            |                |           |                |            |                |           |
| Low strain                                            | 298            | 8.3 (1.8) | 174            | 8.7 (1.9)  | 124            | 7.8 (1.4) |
| Passive                                               | 592            | 8.1 (1.7) | 237            | 8.6 (1.8)  | 355            | 7.7 (1.5) |
| Active                                                | 486            | 8.2 (1.8) | 280            | 8.4 (2.0)  | 206            | 7.8 (1.4) |
| High strain                                           | 344            | 8.0 (1.4) | 141            | 8.5 (1.6)  | 203            | 7.6 (1.2) |
| Effort-reward imbalance                               |                |           |                |            |                |           |
| Yes                                                   | 408            | 8.2 (1.7) | 197            | 8.6 (1.9)  | 211            | 7.8 (1.4) |
| No                                                    | 1281           | 8.1 (1.7) | 618            | 8.6 (1.9)  | 663            | 7.7 (1.4) |

Arterial stiffness (m/s) in different subgroups are presented as mean and standard deviation (SD)

<sup>a</sup>The number of observations used

<sup>b</sup>Hypertension status refer to participants who had high BP or those who reported taking medication to lower their blood pressure.

<sup>c</sup>Pulse pressure = systolic blood pressure – diastolic blood pressure

<sup>d</sup>Diabetes was measured by the item "has a doctor ever told you that you have diabetes?"

<sup>e</sup>Hypercholesterolemia was measured by the item "has a doctor, nurse or other health care professional ever told you that your cholesterol level is too high?"

<sup>f</sup>High waist circumference: ≥ 88 cm (in women) or ≥ 102 cm (in men)

<sup>g</sup> Performed leisure physical activity for 20 to 30 minutes per session at least twice a week

<sup>h</sup> A member of the immediate family (father, mother, brother, or sister) has had a cardiac medical problem (angina, myocardial infarction, coronary bypass) or a stroke (paralysis, embolism, hemorrhage, thrombosis) under the age of 60 years.

**Table 3.** Arterial stiffness (m/s) mean differences at follow-up (2015-2018) and 95% confidence intervals according to psychosocial work-related factors at baseline (1999-2001) in men and women

|                                         | Modele I             | Modele II           | Modele III          | Modele IV            |
|-----------------------------------------|----------------------|---------------------|---------------------|----------------------|
| <b>Job strain in men</b>                |                      |                     |                     |                      |
| Missing values/785 observations read    | 6                    | 28                  | 55                  | 79                   |
| Low strain                              | Ref.                 | Ref.                | Ref.                | Ref.                 |
| Passive                                 | +0.04 (-0.26;+0.33)  | +0.11 (-0.19;+0.41) | +0.16 (-0.15;+0.47) | +0.19 (-0.13;+0.51)  |
| Active                                  | -0.11 (-0.51;+0.29)  | -0.14 (-0.50;+0.23) | -0.14 (-0.51;+0.23) | -0.05 (-0.42;+0.31)  |
| High job strain                         | -0.07 (-0.68;+0.53)  | +0.04 (-0.50;+0.58) | -0.05 (-0.61;+0.51) | -0.02 (-0.55;+0.50)  |
| <b>Job strain in women</b>              |                      |                     |                     |                      |
| Missing values /850 observations read   | 9                    | 44                  | 86                  | 110                  |
| Low strain                              | Ref.                 | Ref.                | Ref.                | Ref.                 |
| Passive                                 | -0.09 (-0.35;+0.18)  | -0.21 (-0.44;+0.02) | -0.20 (-0.42;+0.03) | -0.23 (-0.47;+0.00)  |
| Active                                  | -0.03 (-0.31;+0.24)  | -0.06 (-0.31;+0.18) | -0.03 (-0.30;+0.24) | -0.11 (-0.39;+0.16)  |
| High job strain                         | -0.14 (-0.47;+0.20)  | -0.25 (-0.54;+0.03) | -0.20 (-0.53;+0.13) | -0.27 (-0.59;+0.06)  |
| <b>Effort-Reward Imbalance in men</b>   |                      |                     |                     |                      |
| Missing values /785 observations read   | 22                   | 44                  | 68                  | 79                   |
| ERI (categorical variable)              |                      |                     |                     |                      |
| No                                      | Ref.                 | Ref.                | Ref.                | Ref.                 |
| Yes                                     | +0.13 (-0.22;+0.47)  | +0.02 (-0.27;+0.31) | -0.07 (-0.39;+0.24) | -0.04 (-0.35;+ 0.28) |
| ERI (continuous variable)               | +0.21 (-0.75;+1.17)  | -0.06 (-0.89;+0.76) | -0.27 (-1.19;+0.66) | -0.16 (-1.20;+0.89)  |
| <b>Effort-Reward Imbalance in women</b> |                      |                     |                     |                      |
| Missing values /850 observations read   | 21                   | 53                  | 94                  | 110                  |
| ERI                                     |                      |                     |                     |                      |
| No                                      | Ref.                 | Ref.                | Ref.                | Ref.                 |
| Yes                                     | +0.13 (-0.14;+ 0.39) | +0.05 (-0.16;+0.27) | +0.13 (-0.10;+0.36) | +0.18 (-0.08;+ 0.43) |
| ERI (continuous form)                   | +0.17 (-0.36;+0.69)  | -0.04 (-0.46;+0.38) | +0.12 (-0.25;+0.49) | +0.18 (-0.28;+0.64)  |

Model I: unadjusted;

Model II: I+ age, education, income, marital status, children, familial history of cardiovascular disease at baseline.

Model III: II+ systolic blood pressure (mmHg), diastolic blood pressure (mmHg), diabetes, hypercholesterolemia, body mass index (Kg/m<sup>2</sup>), waist circumference (cm), lifestyle (alcohol abuse, daily smoking, physical activity), psychological distress score at baseline.

Model IV: III+ hours worked per week for the organization, hours worked per week for another organization, effort-reward imbalance (when studying the effect of job strain) or job strain (when studying the effect of effort-reward imbalance) at baseline.

Models are restricted to people with no personal history of cardiovascular disease at baseline.

ERI: effort-reward imbalance

**Table 4.** Arterial stiffness (m/s) mean differences at follow-up (2015-2018) and 95% confidence intervals according to psychosocial work-related factors at baseline (1999-2001) stratified by blood pressure at the time of exposure

|                              | Systolic Blood pressure, mmHg |                            | Diastolic Blood pressure, mmHg |                            | Pulse pressure, mmHg |                            |
|------------------------------|-------------------------------|----------------------------|--------------------------------|----------------------------|----------------------|----------------------------|
|                              | <140                          | ≥140                       | <90                            | ≥90                        | ≤60                  | > 60                       |
| Missing/observations read    | 174/1529                      | 15/106                     | 166/1476                       | 23/159                     | 139/1546             | 4/43                       |
| <b>Job strain</b>            |                               |                            |                                |                            |                      |                            |
| Low strain                   | Ref.                          | Ref.                       | Ref.                           | Ref.                       | Ref.                 | Ref.                       |
| Passive                      | -0.02 (-0.23;+0.19)           | -0.27 (-1.28;+0.74)        | -0.05 (-0.28;+0.18)            | +0.03 (-0.72;+0.79)        | -0.06 (-0.27;+0.14)  | +1.54 (-0.47;+3.55)        |
| Active                       | -0.05 (-0.28;+0.18)           | -0.13 (-1.05;+0.80)        | -0.08 (-0.33;+0.16)            | +0.43 (-0.18;+1.04)        | -0.09 (-0.31;+0.13)  | <b>+2.06 (+0.69;+3.44)</b> |
| High job strain              | -0.17 (-0.40;+0.07)           | +0.84 (-0.35;+2.03)        | <b>-0.25 (-0.48;-0.02)</b>     | <b>+1.38 (+0.57;+2.19)</b> | -0.16 (-0.40;+0.08)  | <b>+3.00 (+1.18;+4.76)</b> |
| Missing/observations read    | 174/1529                      | 15/106                     | 166/1476                       | 23/159                     | 139/1546             | 4/43                       |
| <b>ERI</b>                   |                               |                            |                                |                            |                      |                            |
| No                           | Ref.                          | Ref.                       | Ref.                           | Ref.                       | Ref.                 | Ref.                       |
| Yes                          | +0.13 (-0.08;+0.34)           | <b>-1.17 (-2.12;-0.22)</b> | +0.11 (-0.12;+0.35)            | -0.48 (-1.10;+0.14)        | +0.08 (-0.10;+0.27)  | <b>-2.06 (-3.33;-0.79)</b> |
| <b>ERI (continuous form)</b> | -0.02 (-0.55;+0.50)           | +0.66 (-1.44;+2.77)        | -0.04 (-0.57;+0.50)            | -0.34 (-1.99;+1.31)        | -0.04 (-0.56;+0.48)  | +0.43 (-4.69;+5.55)        |

Models are adjusted for sex and covariates at baseline (age, education, income, marital status, children, systolic blood pressure (mmHg), diastolic blood pressure (mmHg), diabetes, hypercholesterolemia, body mass index (Kg/m<sup>2</sup>), waist circumference (cm), alcohol abuse, daily smoking, physical activity, familial history of cardiovascular disease, psychological distress, hours worked per week for the organization, hours worked per week for another organization, ERI (when studying the effect of job strain) or job strain (when studying the effect of ERI).

Models are restricted to people with no personal history of cardiovascular disease at baseline.

Pulse pressure = systolic blood pressure – diastolic blood pressure

ERI: effort-reward imbalance

#### Figure 1. Flow chart

The start of the original cohort: 1991-1993; Baseline: the baseline for the current study in 1999-2001; Follow-up: the follow-up for the current study in 2015-2018. The current study investigates the association between psychosocial work-related factors measured at baseline (1999-2001) and arterial stiffness measured at follow-up (2015-2018), adjusted for covariates measured at follow-up.

Covariates measured at the start of the original cohort (1991-1993) were used to compute inverse probability of censoring weights (used in order to minimize potential selection bias due to non-response and lost to follow-up).

#### Figure 2. Possible sequences of events between chronic exposure to psychosocial work-related factors and the development of arterial stiffness, hypertension and cardiovascular diseases, based on the cardiovascular continuum

\* Adiposity, smoking, alcohol abuse, excessive salt intake, physical inactivity, dyslipidemia, diabetes, mental health, chronic inflammation.

## References

1. O'Rourke MF, Safar ME, Dzau V. The Cardiovascular Continuum extended: Aging effects on the aorta and microvasculature. *Vascular Medicine*. 2010;15(6):461-8.
2. Belkic K, Landsbergis P, Schnall P, Baker D. Is job strain a major source of cardiovascular disease risk? *SCANDINAVIAN JOURNAL OF WORK ENVIRONMENT & HEALTH*. 2004;30(2):85-128
3. Brisson C, Aboa-Eboulé C, Leroux I, Gilbert-Ouimet M, Vézina M, Bourbonnais R, et al. Work-related psychosocial factors and heart disease. *Heart and mind: The practice of cardiac psychology* (2nd ed). Washington, DC, US: American Psychological Association; 2011. p. 269-85.
4. Vlachopoulos C, Aznaouridis K, Stefanadis C. Prediction of cardiovascular events and all-cause mortality with arterial stiffness. A systematic review and meta-analysis. *Journal of the American College of Cardiology*. 2010;55:1318-27.
5. Michikawa T, Nishiwaki Y, Nomiya T, Uemura T, O'Uchi T, Sakurai H, et al. Job strain and arteriosclerosis in three different types of arteries among male Japanese factory workers. *Scandinavian Journal of Work, Environment & Health*,. 2008;34(1):48-54.
6. Utsugi M, Saijo Y, Yoshioka E, Sato T, Horikawa N, Gong Y, et al. Relationship between two alternative occupational stress models and arterial stiffness: a cross-sectional study among Japanese workers. *Int Arch Occup Environ Health*. 2009;82(2):175-83.
7. Xiu JF, Zheng L, Wang G, Zou L, Li J. THE RELATIONSHIP BETWEEN CHRONIC OCCUPATIONAL STRESS AND ARTERIAL STIFFNESS: A CROSS-SECTIONAL STUDY IN CHINESE WORKERS. *Heart*. 2012;98(Suppl 2):E286.
8. Kaewboonchoo O, Sembajwe G, Li J. Associations between Job Strain and Arterial Stiffness: A Large Survey among Enterprise Employees from Thailand. *Int J Environ Res Public Health*. 2018;15(4).
9. Yook Y-S. Firefighters' occupational stress and its correlations with cardiorespiratory fitness, arterial stiffness, heart rate variability, and sleep quality. *PloS one*. 2019;14(12):e0226739-e.
10. Nomura K, Nakao M, Karita K, Nishikitani M, Yano E. Association between work-related psychological stress and arterial stiffness measured by brachial-ankle pulse-wave velocity in young Japanese males from an information service company. *Scand J Work Environ Health*. 2005;31(5):352-9.
11. Chou L-P, Li C-Y, Hu SC. Work-Related Psychosocial Hazards and Arteriosclerosis A Cross-Sectional Study Among Medical Employees in a Regional Hospital in Taiwan. *International Heart Journal*. 2015;56(6):644-50.
12. Webb AJS. Progression of Arterial Stiffness is Associated With Midlife Diastolic Blood Pressure and Transition to Late-Life Hypertensive Phenotypes. *Journal of the American Heart Association*. 2020;9(1):e014547.
13. Trudel X, Gilbert-Ouimet M, Milot A, Duchaine CS, Vézina M, Laurin D, et al. Cohort Profile: The PROspective Québec (PROQ) Study on Work and Health. *International journal of epidemiology*. 2018.
14. Karasek R, Brisson C, Kawakami N, Houtman I, Bongers P, Amick B. The Job Content Questionnaire (JCQ): An Instrument for Internationally Comparative Assessments of Psychosocial Job Characteristics. *Journal of Occupational Health Psychology*. 1998;3(4):322-55.
15. Karasek R, Schwartz J, Pieper C. Validation of a Survey Instrument for Job-Related Cardiovascular Illness. New York, NY: Department of Industrial Engineering and Operations Research, Columbia University. 1983.

16. Brisson C, Blanchette C, Guimont C, Dion G, Moisan J, Vézina M, et al. Reliability and validity of the French version of the 18-item Karasek job content questionnaire. *Work & Stress: An International Journal of Work, Health & Organisations*. 1998;12(4):322-36.
17. Niedhammer I, Siegrist J, Landre M, Goldberg M, Leclerc A. Étude des qualités psychométriques de la version française du modèle du Déséquilibre Efforts/Récompenses. *Revue d'épidémiologie et de santé publique*. 2000;48:419-37.
18. Karasek R, Gordon G, Pietrokovsky C, Frese M, Pieper C, Schwartz J, et al. Job content questionnaire: Questionnaire and users' guide. Lowell: University of Massachusetts.1985.
19. Aboa-Éboulé C, Brisson C, Blanchette C, Maunsell E, Bourbonnais R, Abdous B, et al. Effort-reward imbalance at work and psychological distress: a validation study of post-myocardial infarction patients. *Psychosomatic medicine*. 2011;73(6):448.
20. Di Iorio BR, Cucciniello E, Alinei P, Torraca S. Reproducibility of regional pulse-wave velocity in uremic subjects. *Hemodialysis international International Symposium on Home Hemodialysis*. 2010;14(4):441-6.
21. Zeger SL, Liang KY. Longitudinal data analysis for discrete and continuous outcomes. *Biometrics*. 1986;42(1):121-30.
22. Gaziano TA, Young CR, Fitzmaurice G, Atwood S, Gaziano JM. Laboratory-based versus non-laboratory-based method for assessment of cardiovascular disease risk: the NHANES I Follow-up Study cohort. *Lancet (London, England)*. 2008;371(9616):923-31.
23. Kivimäki M, Pentti J, Ferrie JE, Batty GD, Nyberg ST, Jokela M, et al. Work stress and risk of death in men and women with and without cardiometabolic disease: a multicohort study. *Lancet Diabetes Endocrinol*. 2018;6(9):705-13.
24. Kivimäki M, Theorell T, Westerlund H, Vahtera J, Alfredsson L. Job strain and ischaemic disease: does the inclusion of older employees in the cohort dilute the association? The WOLF Stockholm Study. *Journal of epidemiology and community health*. 2008;62(4):372-4.
25. White IR, Royston P, Wood AM. Multiple imputation using chained equations: Issues and guidance for practice. *Statistics in medicine*. 2011;30(4):377.
26. Robins JM, Finkelstein DM. Correcting for noncompliance and dependent censoring in an AIDS Clinical Trial with inverse probability of censoring weighted (IPCW) log-rank tests. *Biometrics*. 2000;56(3):779-88.
27. Franklin S, Larson M, Khan S, Wong N, Leip E, Kannel W, et al. Does the Relation of Blood Pressure to Coronary Heart Disease Risk Change With Aging? The Framingham Heart Study. *Circulation*. 2001;103: 1245-9.
28. Laurent S, Boutouyrie P. Arterial Stiffness and Hypertension in the Elderly. *Frontiers in Cardiovascular Medicine*. 2020;7(202).
29. Mattace-Raso F, Hofman A, Verwoert G, Witteman J, Wilkinson I, Cockcroft J, et al. Determinants of pulse wave velocity in healthy people and in the presence of cardiovascular risk factors: 'establishing normal and reference values'. *European Heart Journal*. 2010;31(19):2338-50.
30. Massamba VK, Talbot D, Milot A, Pearce N, Trudel X, Brisson C. Assessment of the healthy worker survivor effect in the relationship between psychosocial work-related factors and hypertension. *Occup Environ Med*. 2019;76(6):414-21.
31. Wang M, Monticone RE, McGraw KR. Proinflammatory Arterial Stiffness Syndrome: A Signature of Large Arterial Aging. *J Vasc Res*. 2018;55(4):210-23.
32. LaRocca TJ, Martens CR, Seals DR. Nutrition and other lifestyle influences on arterial aging. *Ageing Res Rev*. 2017;39:106-19.



- 1  
2  
3 33. Vasan RS, Short MI, Niiranen TJ, Xanthakis V, DeCarli C, Cheng S, et al. Interrelations  
4 Between Arterial Stiffness, Target Organ Damage, and Cardiovascular Disease Outcomes. Journal  
5 of the American Heart Association. 2019;8(14):e012141.  
6  
7 34. Al Mheid I, Hayek SS, Ko YA, Akbik F, Li Q, Ghasemzadeh N, et al. Age and Human  
8 Regenerative Capacity Impact of Cardiovascular Risk Factors. Circulation research.  
9 2016;119(7):801-9.  
10  
11  
12  
13  
14  
15  
16  
17  
18  
19  
20  
21  
22  
23  
24  
25  
26  
27  
28  
29  
30  
31  
32  
33  
34  
35  
36  
37  
38  
39  
40  
41  
42  
43  
44  
45  
46  
47  
48  
49  
50  
51  
52  
53  
54  
55  
56  
57  
58  
59  
60

For peer review only

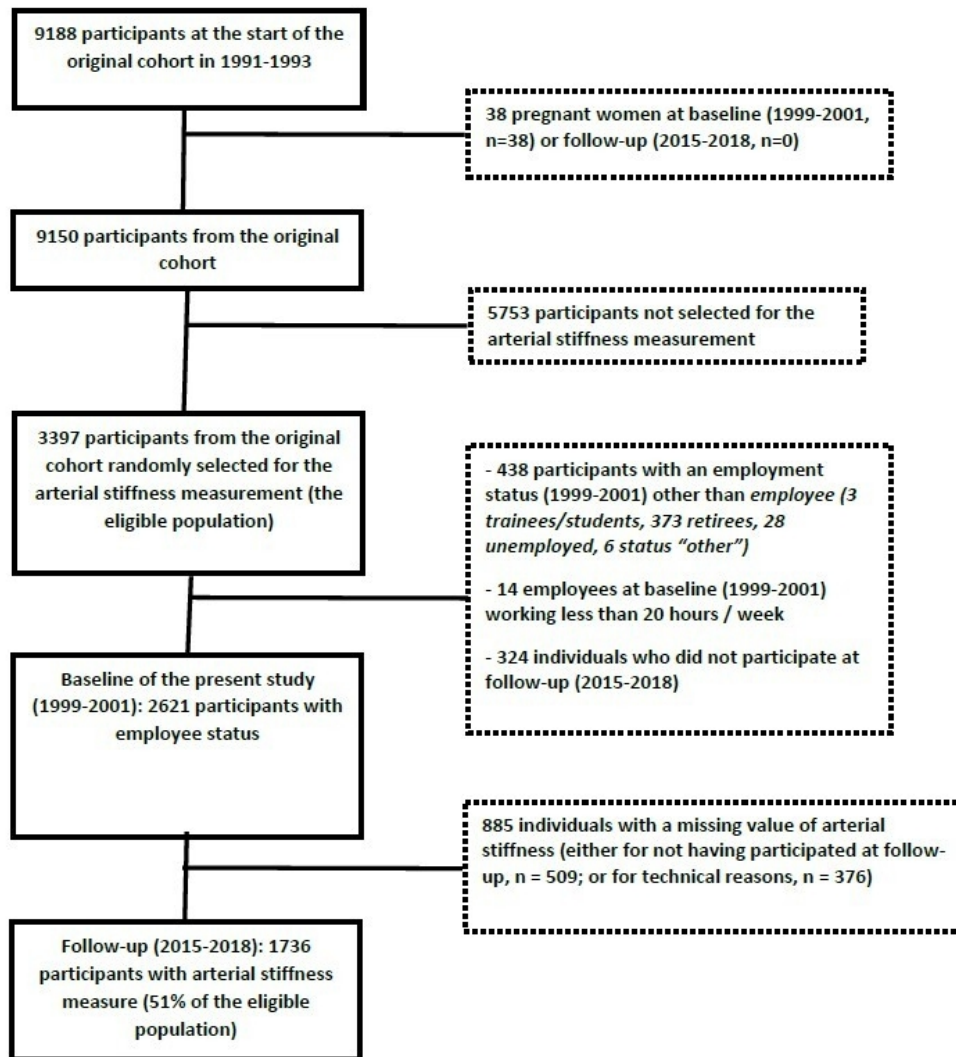

Figure 1. Flow chart

The start of the original cohort: 1991-1993; Baseline: the baseline for the current study in 1999-2001; Follow-up: the follow-up for the current study in 2015-2018. The current study investigates the association between psychosocial work-related factors measured at baseline (1999-2001) and arterial stiffness measured at follow-up (2015-2018), adjusted for covariates measured at follow-up. Covariates measured at the start of the original cohort (1991-1993) were used to compute inverse probability of censoring weights (used in order to minimize potential selection bias due to non-response and lost to follow-up).

61x66mm (300 x 300 DPI)

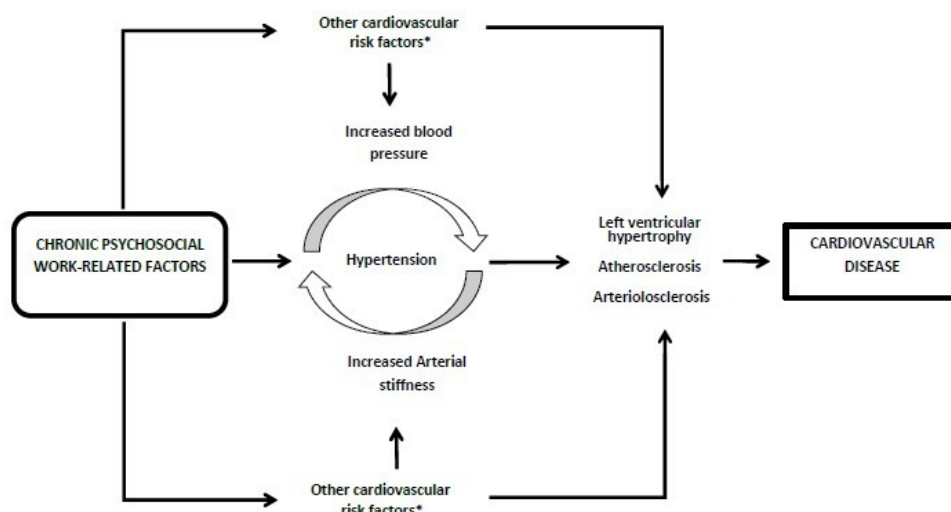

Figure 2. Possible sequences of events between chronic exposure to psychosocial work-related factors and the development of arterial stiffness, hypertension and cardiovascular diseases, based on the cardiovascular continuum

\* Adiposity, smoking, alcohol abuse, excessive salt intake, physical inactivity, dyslipidemia, diabetes, mental health, chronic inflammation.

61x33mm (300 x 300 DPI)

1  
2  
3  
4  
5  
6  
7  
8  
9  
10  
11  
12  
13  
14  
15  
16  
17  
18  
19  
20  
21  
22  
23  
24  
25  
26  
27  
28  
29  
30  
31  
32  
33  
34  
35  
36  
37  
38  
39  
40  
41  
42  
43  
44  
45  
46  
47

Table S1. Arterial stiffness (cfPWV in m/s) mean differences at follow-up and 95% confidence intervals according to work-related psychosocial factors (job strain and effort-reward imbalance) at baseline (1999-2001) stratified by age and Gaziano’s predicted cardiovascular risk at the time of exposure

|                                     | Age, years          |                     | Gaziano’s predicted cardiovascular risk |                     |
|-------------------------------------|---------------------|---------------------|-----------------------------------------|---------------------|
|                                     | <55                 | ≥55                 | Weak                                    | Moderate or high    |
| Missing/observations read           | 162/1523            | 27/112              | 110/1383                                | 28/201              |
| <b>Job strain</b>                   |                     |                     |                                         |                     |
| Low strain                          | Ref.                | Ref.                | Ref.                                    | Ref.                |
| Passive                             | -0.06 (-0.29;+0.17) | +0.25 (-0.74;+1.23) | -0.10 (-0.33;+0.13)                     | +0.30 (-0.34;+0.94) |
| Active                              | -0.07 (-0.31;+0.17) | +0.26 (-0.68;+1.21) | -0.08 (-0.33;+0.17)                     | +0.16 (-0.40;+0.72) |
| High job strain                     | -0.11 (-0.35;+0.14) | +0.55 (-1.23;+2.34) | -0.13 (-0.37;+0.11)                     | +0.24 (-0.55;+1.03) |
| Missing/observations read           | 162/1523            | 27/112              | 110/1383                                | 28/201              |
| <b>ERI (2 categories)</b>           |                     |                     |                                         |                     |
| No                                  | Ref.                | Ref.                | Ref.                                    | Ref.                |
| Yes                                 | +0.06 (-0.13;+0.25) | +0.52 (-0.67;+1.71) | +0.08 (-0.11;+0.28)                     | -0.20 (-0.77;+0.37) |
| <b>ERI as a continuous variable</b> | +0.04 (-0.46;+0.54) | -0.32 (-3.25;+2.62) | +0.04 (-0.53;+0.60)                     | -0.21 (-1.54;+1.12) |

Models are adjusted for gender and covariates at baseline(age, education, income, marital status, children, systolic blood pressure (mmHg), diastolic blood pressure (mmHg), diabetes, hypercholesterolemia, BMI, waist circumference (cm), alcohol abuse, daily smoking, physical activity, familial history of cardiovascular disease, psychological distress, hours worked per week for the organization, hours worked per week for another organization, ERI (when studying the effect of job strain) or job strain (when studying the effect of ERI). Models are restricted to people with no personal history of cardiovascular disease at baseline.

ERI: effort-reward imbalance  
 cfPWV: carotid-femoral pulse wave velocity  
 Baseline: 1999-2001; follow-up: 2015-2018

Table S2a. Arterial stiffness (cfPWV in m/s) mean differences at follow-up and 95% confidence intervals according to work-related psychosocial factors (job strain and effort-reward imbalance) at baseline stratified by employment status at the time of arterial stiffness measurement (fully adjusted model\*)

|                                                         | Employees           | Non-employees       |
|---------------------------------------------------------|---------------------|---------------------|
| Missing/observations read                               | 49/492              | 139/1137            |
| <b>Job strain</b>                                       |                     |                     |
| Low strain                                              | Ref                 | Ref                 |
| Passive                                                 | -0.04 (-0.24;+0.16) | -0.05 (-0.28;+0.19) |
| Active                                                  | -0.18 (-0.52;+0.16) | +0.04 (-0.29;+0.36) |
| High job strain                                         | +0.00 (-0.33;+0.34) | -0.14 (-0.41;+0.13) |
| Missing/observations read                               | 49/492              | 139/1137            |
| <b>Effort-reward imbalance (2 categories)</b>           |                     |                     |
| No                                                      | Ref                 | Ref                 |
| Yes                                                     | +0.13 (-0.12;+0.37) | +0.05 (-0.23;+0.34) |
| <b>Effort-reward imbalance as a continuous variable</b> | +0.43 (-0.33;+1.18) | -0.04 (-0.70;+0.61) |

\*The model is adjusted for covariates at baseline (age, education, income, marital status, having at least on child, systolic blood pressure, diastolic blood pressure, diabetes, hypercholesterolemia, body mass index, waist circumference, alcohol abuse, daily smoking, physical activity, familial history of CVD, psychological distress, hours worked per week for the organization, hours worked per week for another organization, effort-reward imbalance (when studying the effect of job strain) or job strain (when studying the effect of effort-reward imbalance).) and for gender. People with personal history of cardiovascular events at baseline are not included.

The category of people with imprecise employment status was excluded from stratification given a low size.

Baseline: 1999-2001; follow-up: 2015-2018

1  
2  
3  
4  
5  
6  
7  
8  
9  
10  
11  
12  
13  
14  
15  
16  
17  
18  
19  
20  
21  
22  
23  
24  
25  
26  
27  
28  
29  
30  
31  
32  
33  
34  
35  
36  
37  
38  
39  
40  
41  
42  
43  
44  
45  
46  
47

Table S2b. Arterial stiffness (m/s) mean differences at follow-up and 95% confidence intervals according to work-related psychosocial factors (job strain and effort-reward imbalance) at baseline in participants with the status of retired in follow-up according to the duration of the retirement (fully adjusted model\*)

|                                                         | The duration of the retirement |                      |
|---------------------------------------------------------|--------------------------------|----------------------|
|                                                         | ≤ 2 years                      | > 2 years            |
| Missing/observations read                               | 34/293                         | 90/778               |
| <b>Job strain</b>                                       |                                |                      |
| Low strain                                              | Ref.                           | Ref.                 |
| Passive                                                 | +0.07 (-0.34;+0.49)            | -0.10 (-0.40;+0.19)  |
| Active                                                  | -0.14 (-0.54;+0.27)            | -0.04 (-0.36;+0.29)  |
| High job strain                                         | -0.24 (-0.69;+0.22)            | -0.20 (-0.58;+0.19)  |
| Missing/observations read                               | 34/293                         | 90/778               |
| <b>Effort-reward imbalance (2 categories)</b>           |                                |                      |
| No                                                      | Ref                            | Ref                  |
| Yes                                                     | +0.03 (-0.30;+0.35)            | +0.20 (-0.14;+0.55)  |
| <b>Effort-reward imbalance as a continuous variable</b> | -0.26 (-0.91;+0.38)            | +0.29 (-0.61 ;+1.19) |

The model is adjusted for covariates at baseline (age, education, income, marital status, having at least on child, systolic blood pressure, diastolic blood pressure, diabetes, hypercholesterolemia, body mass index, waist circumference, alcohol abuse, daily smoking, physical activity, familial history of CVD, psychological distress, hours worked per week for the organization, hours worked per week for another organization, effort-reward imbalance (when studying the effect of job strain) or job strain (when studying the effect of effort-reward imbalance)) and for gender. People with personal history of cardiovascular events at baseline are not included. Baseline: 1999-2001; follow-up: 2015-2018

Table S3. Arterial stiffness (m/s) mean differences at follow-up and 95% confidence intervals according to work-related psychosocial factors (job strain and effort-reward imbalance) at baseline with and without participants with personal history of cardiovascular events\* at baseline (fully adjusted models)

| Exposure                                | With individuals with personal history of CVD at baseline (Model A) | Without individuals with personal history of CVD at baseline (Model B) |
|-----------------------------------------|---------------------------------------------------------------------|------------------------------------------------------------------------|
| <b>Job strain in men</b>                |                                                                     |                                                                        |
| Low strain                              | Ref.                                                                | Ref.                                                                   |
| Passive                                 | +0.21 (-0.10;+0.51)                                                 | +0.19 (-0.13;+0.51)                                                    |
| Active                                  | -0.11 (-0.45;+0.24)                                                 | -0.05 (-0.42;+0.31)                                                    |
| High job strain                         | -0.02 (-0.57;+0.52)                                                 | -0.02 (-0.55;+0.50)                                                    |
| <b>Job strain in women</b>              |                                                                     |                                                                        |
| Low strain                              | Ref.                                                                | Ref.                                                                   |
| Passive                                 | -0.18 (-0.40;+0.05)                                                 | -0.23 (-0.47;+0.00)                                                    |
| Active                                  | -0.03 (-0.34;+0.28)                                                 | -0.11 (-0.39;+0.16)                                                    |
| High job strain                         | <b>-0.30 (-0.57;-0.02)</b>                                          | -0.27 (-0.59;+0.06)                                                    |
| <b>Effort-reward imbalance in men</b>   |                                                                     |                                                                        |
| No                                      | Ref.                                                                | Ref.                                                                   |
| Yes                                     | -0.09 (-0.43;+ 0.26)                                                | -0.04 (-0.35;+ 0.28)                                                   |
| <b>Effort-reward imbalance in women</b> |                                                                     |                                                                        |
| No                                      | Ref.                                                                | Ref.                                                                   |
| Yes                                     | +0.22 (-0.10;+ 0.53)                                                | +0.18 (-0.08;+ 0.43)                                                   |

\* Cardiovascular events: angina pectoris, acute myocardial infarction, coronary bypass surgery, dilation

Model A includes covariates at baseline (age, education, income, marital status, having at least on child, systolic blood pressure, diastolic blood pressure, diabetes, hypercholesterolemia, body mass index, waist circumference, alcohol abuse, daily smoking, physical activity, familial history of CVD, personal history of CVD, psychological distress, hours worked per week for the organization, hours worked per week for another organization, effort-reward imbalance (when studying the effect of job strain) or job strain (when studying the effect of effort-reward imbalance).).

Model B= Model A without participants with personal history of cardiovascular events at baseline (n=101)

Baseline: 1999-2001; follow-up: 2015-2018

Table S4. Arterial stiffness (m/s) mean differences at follow-up and 95% confidence intervals according to work-related psychosocial factors (job strain and effort-reward imbalance) at baseline before and after correction for selection bias (fully adjusted models\*)

|                                     | Men                  |                     |                     | Women                |                     |                     |
|-------------------------------------|----------------------|---------------------|---------------------|----------------------|---------------------|---------------------|
|                                     | No imputation        | 42 imputations      | IPW                 | No imputations       | 42 imputations      | IPW                 |
| <b>Job strain</b>                   |                      |                     |                     |                      |                     |                     |
| Low strain                          | Ref.                 | Ref.                | Ref..               | Ref.                 | Ref.                | Ref.                |
| Passive                             | +0.19 (-0.13;+0.51)  | +0.10 (-0.19;+0.39) | +0.10 (-0.27;+0.47) | -0.23 (-0.47;+0.00)  | -0.19 (-0.44;+0.06) | -0.12 (-0.49;+0.24) |
| Active                              | -0.05 (-0.42;+0.31)  | -0.06 (-0.39;+0.28) | +0.01 (-0.43;+0.44) | -0.11 (-0.39;+0.16)  | -0.10 (-0.37;+0.16) | -0.08 (-0.49;+0.33) |
| High job strain                     | -0.02 (-0.55;+0.50)  | -0.07 (-0.50;+0.36) | -0.05 (-0.59;+0.48) | -0.27 (-0.59;+0.06)  | -0.25 (-0.59;+0.09) | -0.23 (-0.60;+0.14) |
| <b>ERI</b>                          |                      |                     |                     |                      |                     |                     |
| No                                  | Ref.                 | Ref.                | Ref.                | Ref.                 | Ref.                | Ref.                |
| Yes                                 | -0.04 (-0.35;+ 0.28) | +0.07 (-0.18;+0.32) | +0.21 (-0.11;+0.55) | +0.18 (-0.08;+ 0.43) | +0.09 (-0.13;+0.31) | +0.07 (-0.22;+0.36) |
| <b>ERI as a continuous variable</b> | -0.16 (-1.20;+0.89)  | +0.25 (-0.64;+1.14) | +0.29 (-0.72;+1.30) | +0.18 (-0.28;+0.64)  | +0.13 (-0.43;+0.69) | +0.09 (-0.62;+0.80) |

\*Models are adjusted for covariates at baseline (age, education, income, marital status, having at least on child, systolic blood pressure, diastolic blood pressure, diabetes, hypercholesterolemia, body mass index, waist circumference, alcohol abuse, daily smoking, physical activity, familial history of CVD, psychological distress, hours worked per week for the organization, hours worked per week for another organization, effort-reward imbalance (when studying the effect of job strain) or job strain (when studying the effect of effort-reward imbalance).). Models are restricted to people with no personal history of cardiovascular events at baseline.

ERI: effort-reward imbalance  
IPW: inverse probability weighting  
Baseline: 1999-2001; follow-up: 2015-2018



## References

1. Gaziano TA, Young CR, Fitzmaurice G, Atwood S, Gaziano JM. Laboratory-based versus non-laboratory-based method for assessment of cardiovascular disease risk: the NHANES I Follow-up Study cohort. *Lancet (London, England)*. 2008;371(9616):923-31.
2. Pandya A, Weinstein MC, Gaziano TA. A comparative assessment of non-laboratory-based versus commonly used laboratory-based cardiovascular disease risk scores in the NHANES III population. *PLoS one*. 2011;6(5):e20416-e.

For peer review only

STROBE Statement—Checklist of items that should be included in reports of *cohort studies*

|                              | Item No | Recommendation                                                                                                                                                                                                                                                                                                         | Page No               |
|------------------------------|---------|------------------------------------------------------------------------------------------------------------------------------------------------------------------------------------------------------------------------------------------------------------------------------------------------------------------------|-----------------------|
| <b>Title and abstract</b>    | 1       | (a) Indicate the study's design with a commonly used term in the title or the abstract<br>(b) Provide in the abstract an informative and balanced summary of what was done and what was found                                                                                                                          | 1;2<br>2              |
| <b>Introduction</b>          |         |                                                                                                                                                                                                                                                                                                                        |                       |
| Background/rationale         | 2       | Explain the scientific background and rationale for the investigation being reported                                                                                                                                                                                                                                   | 4                     |
| Objectives                   | 3       | State specific objectives, including any prespecified hypotheses                                                                                                                                                                                                                                                       | 4                     |
| <b>Methods</b>               |         |                                                                                                                                                                                                                                                                                                                        |                       |
| Study design                 | 4       | Present key elements of study design early in the paper                                                                                                                                                                                                                                                                | 4;5                   |
| Setting                      | 5       | Describe the setting, locations, and relevant dates, including periods of recruitment, exposure, follow-up, and data collection                                                                                                                                                                                        | 5                     |
| Participants                 | 6       | (a) Give the eligibility criteria, and the sources and methods of selection of participants. Describe methods of follow-up<br>(b) For matched studies, give matching criteria and number of exposed and unexposed                                                                                                      | 5                     |
| Variables                    | 7       | Clearly define all outcomes, exposures, predictors, potential confounders, and effect modifiers. Give diagnostic criteria, if applicable                                                                                                                                                                               | 5;6;7                 |
| Data sources/<br>measurement | 8*      | For each variable of interest, give sources of data and details of methods of assessment (measurement). Describe comparability of assessment methods if there is more than one group                                                                                                                                   | 5;6                   |
| Bias                         | 9       | Describe any efforts to address potential sources of bias                                                                                                                                                                                                                                                              | 7                     |
| Study size                   | 10      | Explain how the study size was arrived at                                                                                                                                                                                                                                                                              | 5                     |
| Quantitative variables       | 11      | Explain how quantitative variables were handled in the analyses. If applicable, describe which groupings were chosen and why                                                                                                                                                                                           | 7                     |
| Statistical methods          | 12      | (a) Describe all statistical methods, including those used to control for confounding<br>(b) Describe any methods used to examine subgroups and interactions<br>(c) Explain how missing data were addressed<br>(d) If applicable, explain how loss to follow-up was addressed<br>(e) Describe any sensitivity analyses | 7<br>7<br>7<br>7<br>7 |
| <b>Results</b>               |         |                                                                                                                                                                                                                                                                                                                        |                       |
| Participants                 | 13*     | (a) Report numbers of individuals at each stage of study—eg numbers potentially eligible, examined for eligibility, confirmed eligible, included in the study, completing follow-up, and analysed<br>(b) Give reasons for non-participation at each stage<br>(c) Consider use of a flow diagram                        | 5<br>5<br>5           |
| Descriptive data             | 14*     | (a) Give characteristics of study participants (eg demographic, clinical, social) and information on exposures and potential confounders<br>(b) Indicate number of participants with missing data for each variable of interest<br>(c) Summarise follow-up time (eg, average and total amount)                         | 8;15;16<br>15;16<br>8 |
| Outcome data                 | 15*     | Report numbers of outcome events or summary measures over time                                                                                                                                                                                                                                                         | 8;17                  |

|    |                          |    |                                                                                                                                                                                                              |           |
|----|--------------------------|----|--------------------------------------------------------------------------------------------------------------------------------------------------------------------------------------------------------------|-----------|
| 1  | Main results             | 16 | (a) Give unadjusted estimates and, if applicable, confounder-adjusted estimates and their precision (eg, 95% confidence interval). Make clear which confounders were adjusted for and why they were included | 6;7;18;19 |
| 2  |                          |    | (b) Report category boundaries when continuous variables were categorized                                                                                                                                    | 16;17     |
| 3  |                          |    | (c) If relevant, consider translating estimates of relative risk into absolute risk for a meaningful time period                                                                                             |           |
| 4  | Other analyses           | 17 | Report other analyses done—eg analyses of subgroups and interactions, and sensitivity analyses                                                                                                               | 7;9       |
| 5  | <b>Discussion</b>        |    |                                                                                                                                                                                                              |           |
| 6  | Key results              | 18 | Summarise key results with reference to study objectives                                                                                                                                                     | 9         |
| 7  | Limitations              | 19 | Discuss limitations of the study, taking into account sources of potential bias or imprecision. Discuss both direction and magnitude of any potential bias                                                   | 12        |
| 8  | Interpretation           | 20 | Give a cautious overall interpretation of results considering objectives, limitations, multiplicity of analyses, results from similar studies, and other relevant evidence                                   | 10;11;12  |
| 9  | Generalisability         | 21 | Discuss the generalisability (external validity) of the study results                                                                                                                                        | 12        |
| 10 | <b>Other information</b> |    |                                                                                                                                                                                                              |           |
| 11 | Funding                  | 22 | Give the source of funding and the role of the funders for the present study and, if applicable, for the original study on which the present article is based                                                | 13;14     |

\*Give information separately for exposed and unexposed groups.

**Note:** An Explanation and Elaboration article discusses each checklist item and gives methodological background and published examples of transparent reporting. The STROBE checklist is best used in conjunction with this article (freely available on the Web sites of PLoS Medicine at <http://www.plosmedicine.org/>, Annals of Internal Medicine at <http://www.annals.org/>, and Epidemiology at <http://www.epidem.com/>). Information on the STROBE Initiative is available at <http://www.strobe-statement.org>.
