# Supplementary material for: Association between psychosocial work-related factors at midlife and arterial stiffness at older age in a prospective cohort of 1736 white-collar workers
Source: PubMed Central journal article supplement — BMJ Open. 2023 Sep 27;13(9):e073649. doi: 10.1136/bmjopen-2023-073649 (PMC10537828; doi:10.1136/bmjopen-2023-073649), 2023-09-27
Supplement: bmjopen-2023-073649supp001.pdf [file bmjopen-2023-073649supp001.pdf]

Table S1. Arterial stiffness (cfPWV in m/s) mean differences at follow-up and 95% confidence intervals according to work-related psychosocial factors (job strain and effort-reward imbalance) at baseline (1999-2001) stratified by age and Gaziano's predicted cardiovascular risk at the time of exposure

|                                     | Age, years          |                     | Gaziano's predicted cardiovascular risk |                     |
|-------------------------------------|---------------------|---------------------|-----------------------------------------|---------------------|
|                                     | <55                 | ≥55                 | Weak                                    | Moderate or high    |
| Missing/observations read           | 162/1523            | 27/112              | 110/1383                                | 28/201              |
| <b>Job strain</b>                   |                     |                     |                                         |                     |
| Low strain                          | Ref.                | Ref.                | Ref.                                    | Ref.                |
| Passive                             | -0.06 (-0.29;+0.17) | +0.25 (-0.74;+1.23) | -0.10 (-0.33;+0.13)                     | +0.30 (-0.34;+0.94) |
| Active                              | -0.07 (-0.31;+0.17) | +0.26 (-0.68;+1.21) | -0.08 (-0.33;+0.17)                     | +0.16 (-0.40;+0.72) |
| High job strain                     | -0.11 (-0.35;+0.14) | +0.55 (-1.23;+2.34) | -0.13 (-0.37;+0.11)                     | +0.24 (-0.55;+1.03) |
| Missing/observations read           | 162/1523            | 27/112              | 110/1383                                | 28/201              |
| <b>ERI (2 categories)</b>           |                     |                     |                                         |                     |
| No                                  | Ref.                | Ref.                | Ref.                                    | Ref.                |
| Yes                                 | +0.06 (-0.13;+0.25) | +0.52 (-0.67;+1.71) | +0.08 (-0.11;+0.28)                     | -0.20 (-0.77;+0.37) |
| <b>ERI as a continuous variable</b> | +0.04 (-0.46;+0.54) | -0.32 (-3.25;+2.62) | +0.04 (-0.53;+0.60)                     | -0.21 (-1.54;+1.12) |

Models are adjusted for gender and covariates at baseline (age, education, income, marital status, children, systolic blood pressure (mmHg), diastolic blood pressure (mmHg), diabetes, hypercholesterolemia, BMI, waist circumference (cm), alcohol abuse, daily smoking, physical activity, familial history of cardiovascular disease, psychological distress, hours worked per week for the organization, hours worked per week for another organization, ERI (when studying the effect of job strain) or job strain (when studying the effect of ERI)).

Models are restricted to people with no personal history of cardiovascular disease at baseline.

ERI: effort-reward imbalance

cfPWV: carotid-femoral pulse wave velocity

Baseline: 1999-2001; follow-up: 2015-2018

Table S2a. Arterial stiffness (cfPWV in m/s) mean differences at follow-up and 95% confidence intervals according to work-related psychosocial factors (job strain and effort-reward imbalance) at baseline stratified by employment status at the time of arterial stiffness measurement (fully adjusted model\*)

|                                                         | Employees           | Non-employees       |
|---------------------------------------------------------|---------------------|---------------------|
| Missing/observations read                               | 49/492              | 139/1137            |
| <b>Job strain</b>                                       |                     |                     |
| Low strain                                              | Ref                 | Ref                 |
| Passive                                                 | -0.04 (-0.24;+0.16) | -0.05 (-0.28;+0.19) |
| Active                                                  | -0.18 (-0.52;+0.16) | +0.04 (-0.29;+0.36) |
| High job strain                                         | +0.00 (-0.33;+0.34) | -0.14 (-0.41;+0.13) |
| Missing/observations read                               | 49/492              | 139/1137            |
| <b>Effort-reward imbalance (2 categories)</b>           |                     |                     |
| No                                                      | Ref                 | Ref                 |
| Yes                                                     | +0.13 (-0.12;+0.37) | +0.05 (-0.23;+0.34) |
| <b>Effort-reward imbalance as a continuous variable</b> | +0.43 (-0.33;+1.18) | -0.04 (-0.70;+0.61) |

\*The model is adjusted for covariates at baseline (age, education, income, marital status, having at least on child, systolic blood pressure, diastolic blood pressure, diabetes, hypercholesterolemia, body mass index, waist circumference, alcohol abuse, daily smoking, physical activity, familial history of CVD, psychological distress, hours worked per week for the organization, hours worked per week for another organization, effort-reward imbalance (when studying the effect of job strain) or job strain (when studying the effect of effort-reward imbalance).) and for gender. People with personal history of cardiovascular events at baseline are not included.

The category of people with imprecise employment status was excluded from stratification given a low size.

Baseline: 1999-2001; follow-up: 2015-2018

Table S2b. Arterial stiffness (m/s) mean differences at follow-up and 95% confidence intervals according to work-related psychosocial factors (job strain and effort-reward imbalance) at baseline in participants with the status of retired in follow-up according to the duration of the retirement (fully adjusted model\*)

|                                                         | The duration of the retirement |                      |
|---------------------------------------------------------|--------------------------------|----------------------|
|                                                         | ≤ 2 years                      | > 2 years            |
| Missing/observations read                               | 34/293                         | 90/778               |
| <b>Job strain</b>                                       |                                |                      |
| Low strain                                              | Ref.                           | Ref.                 |
| Passive                                                 | +0.07 (-0.34;+0.49)            | -0.10 (-0.40;+0.19)  |
| Active                                                  | -0.14 (-0.54;+0.27)            | -0.04 (-0.36;+0.29)  |
| High job strain                                         | -0.24 (-0.69;+0.22)            | -0.20 (-0.58;+0.19)  |
| Missing/observations read                               | 34/293                         | 90/778               |
| <b>Effort-reward imbalance (2 categories)</b>           |                                |                      |
| No                                                      | Ref                            | Ref                  |
| Yes                                                     | +0.03 (-0.30;+0.35)            | +0.20 (-0.14;+0.55)  |
| <b>Effort-reward imbalance as a continuous variable</b> | -0.26 (-0.91;+0.38)            | +0.29 (-0.61 ;+1.19) |

The model is adjusted for covariates at baseline (age, education, income, marital status, having at least on child, systolic blood pressure, diastolic blood pressure, diabetes, hypercholesterolemia, body mass index, waist circumference, alcohol abuse, daily smoking, physical activity, familial history of CVD, psychological distress, hours worked per week for the organization, hours worked per week for another organization, effort-reward imbalance (when studying the effect of job strain) or job strain (when studying the effect of effort-reward imbalance)) and for gender. People with personal history of cardiovascular events at baseline are not included.

Baseline: 1999-2001; follow-up: 2015-2018

Table S3. Arterial stiffness (m/s) mean differences at follow-up and 95% confidence intervals according to work-related psychosocial factors (job strain and effort-reward imbalance) at baseline with and without participants with personal history of cardiovascular events\* at baseline (fully adjusted models)

| Exposure                                | With individuals with personal history of CVD at baseline (Model A) | Without individuals with personal history of CVD at baseline (Model B) |
|-----------------------------------------|---------------------------------------------------------------------|------------------------------------------------------------------------|
| <b>Job strain in men</b>                |                                                                     |                                                                        |
| Low strain                              | Ref.                                                                | Ref.                                                                   |
| Passive                                 | +0.21 (-0.10;+0.51)                                                 | +0.19 (-0.13;+0.51)                                                    |
| Active                                  | -0.11 (-0.45;+0.24)                                                 | -0.05 (-0.42;+0.31)                                                    |
| High job strain                         | -0.02 -0.57;+0.52)                                                  | -0.02 (-0.55;+0.50)                                                    |
| <b>Job strain in women</b>              |                                                                     |                                                                        |
| Low strain                              | Ref.                                                                | Ref.                                                                   |
| Passive                                 | -0.18 (-0.40;+0.05)                                                 | -0.23 (-0.47;+0.00)                                                    |
| Active                                  | -0.03 (-0.34;+0.28)                                                 | -0.11 (-0.39;+0.16)                                                    |
| High job strain                         | <b>-0.30 (-0.57;-0.02)</b>                                          | -0.27 (-0.59;+0.06)                                                    |
| <b>Effort-reward imbalance in men</b>   |                                                                     |                                                                        |
| No                                      | Ref.                                                                | Ref.                                                                   |
| Yes                                     | -0.09 (-0.43;+ 0.26)                                                | -0.04 (-0.35;+ 0.28)                                                   |
| <b>Effort-reward imbalance in women</b> |                                                                     |                                                                        |
| No                                      | Ref.                                                                | Ref.                                                                   |
| Yes                                     | +0.22 (-0.10;+ 0.53)                                                | +0.18 (-0.08;+ 0.43)                                                   |

\* Cardiovascular events: angina pectoris, acute myocardial infarction, coronary bypass surgery, dilation

Model A includes covariates at baseline (age, education, income, marital status, having at least on child, systolic blood pressure, diastolic blood pressure, diabetes, hypercholesterolemia, body mass index, waist circumference, alcohol abuse, daily smoking, physical activity, familial history of CVD, personal history of CVD, psychological distress, hours worked per week for the organization, hours worked per week for another organization, effort-reward imbalance (when studying the effect of job strain) or job strain (when studying the effect of effort-reward imbalance)).

Model B= Model A without participants with personal history of cardiovascular events at baseline (n=101)

Baseline: 1999-2001; follow-up: 2015-2018

Table S4. Arterial stiffness (m/s) mean differences at follow-up and 95% confidence intervals according to work-related psychosocial factors (job strain and effort-reward imbalance) at baseline before and after correction for selection bias (fully adjusted models\*)

|                                     | Men                  |                     |                     | Women                |                     |                     |
|-------------------------------------|----------------------|---------------------|---------------------|----------------------|---------------------|---------------------|
|                                     | No imputation        | 42 imputations      | IPW                 | No imputations       | 42 imputations      | IPW                 |
| <b>Job strain</b>                   |                      |                     |                     |                      |                     |                     |
| Low strain                          | Ref.                 | Ref.                | Ref.                | Ref.                 | Ref.                | Ref.                |
| Passive                             | +0.19 (-0.13;+0.51)  | +0.10 (-0.19;+0.39) | +0.10 (-0.27;+0.47) | -0.23 (-0.47;+0.00)  | -0.19 (-0.44;+0.06) | -0.12 (-0.49;+0.24) |
| Active                              | -0.05 (-0.42;+0.31)  | -0.06 (-0.39;+0.28) | +0.01 (-0.43;+0.44) | -0.11 (-0.39;+0.16)  | -0.10 (-0.37;+0.16) | -0.08 (-0.49;+0.33) |
| High job strain                     | -0.02 (-0.55;+0.50)  | -0.07 (-0.50;+0.36) | -0.05 (-0.59;+0.48) | -0.27 (-0.59;+0.06)  | -0.25 (-0.59;+0.09) | -0.23 (-0.60;+0.14) |
| <b>ERI</b>                          |                      |                     |                     |                      |                     |                     |
| No                                  | Ref.                 | Ref.                | Ref.                | Ref.                 | Ref.                | Ref.                |
| Yes                                 | -0.04 (-0.35;+ 0.28) | +0.07 (-0.18;+0.32) | +0.21 (-0.11;+0.55) | +0.18 (-0.08;+ 0.43) | +0.09 (-0.13;+0.31) | +0.07 (-0.22;+0.36) |
| <b>ERI as a continuous variable</b> | -0.16 (-1.20;+0.89)  | +0.25 (-0.64;+1.14) | +0.29 (-0.72;+1.30) | +0.18 (-0.28;+0.64)  | +0.13 (-0.43;+0.69) | +0.09 (-0.62;+0.80) |

\*Models are adjusted for covariates at baseline (age, education, income, marital status, having at least on child, systolic blood pressure, diastolic blood pressure, diabetes, hypercholesterolemia, body mass index, waist circumference, alcohol abuse, daily smoking, physical activity, familial history of CVD, psychological distress, hours worked per week for the organization, hours worked per week for another organization, effort-reward imbalance (when studying the effect of job strain) or job strain (when studying the effect of effort-reward imbalance)).

Models are restricted to people with no personal history of cardiovascular events at baseline.

ERI: effort-reward imbalance

IPW: inverse probability weighting

Baseline: 1999-2001; follow-up: 2015-2018

## References

1. Gaziano TA, Young CR, Fitzmaurice G, Atwood S, Gaziano JM. Laboratory-based versus non-laboratory-based method for assessment of cardiovascular disease risk: the NHANES I Follow-up Study cohort. *Lancet (London, England)*. 2008;371(9616):923-31.
2. Pandya A, Weinstein MC, Gaziano TA. A comparative assessment of non-laboratory-based versus commonly used laboratory-based cardiovascular disease risk scores in the NHANES III population. *PloS one*. 2011;6(5):e20416-e.
